# Supplementary material
Source: PubMed Central journal article supplement (PMC2898559)
Supplement: NIHMS205421-supplement-1_si_001.pdf [file NIHMS205421-supplement-1_si_001.pdf]

# Supporting Information

for

## Sources and Deposition of Polycyclic Aromatic Hydrocarbons to Western U.S. National Parks.

*SASCHA USENKO<sup>†</sup>, STACI L. MASSEY SIMONICH<sup>\*†‡</sup>, KIMBERLY J. HAGEMAN<sup>@</sup>, JILL E.  
SCHRLAU<sup>†</sup>, LINDA GEISER<sup>‡</sup>, DON H. CAMPBELL<sup>§</sup>, PETER G. APPLEBY<sup>⊥</sup>,  
AND DIXON H. LANDERS<sup>§</sup>*

<sup>†</sup>Department of Chemistry, <sup>‡</sup>Department of Environmental & Molecular Toxicology, Oregon State  
University, Corvallis, Oregon 97331

<sup>@</sup>Department of Chemistry, University of Otago, Dunedin 9014 New Zealand

<sup>‡</sup>United States Department of Agriculture-Forest Service, Pacific Northwest Region Air Program  
Corvallis, OR 97330, USA

<sup>§</sup>US Geological Survey - Water Resources Division, Denver Federal Center, Lakewood, CO, USA

<sup>⊥</sup>Environmental Radioactivity Research Centre, University of Liverpool, Liverpool L69 3BX, UK

<sup>§</sup>United States Environmental Protection Agency-Western Ecology Division, Corvallis, OR 97333, USA

**Lacustrine Catchments.** Emerald Lake (Sequoia) is a high-altitude cirque lake (2800 meter above sea level (masl)) with a predominantly granite catchment orientated northwest. Pear Lake (Sequoia) is also a high-altitude cirque lake (2904 masl) located 0.5 km from Emerald Lake; its granite catchment is orientated north. Mills Lake (Rocky) is a high-altitude cirque lake (~3030 masl) located east of the Continental Divide. Lone Pine Lake (Rocky) (~3024 masl) is located approximately 10 km from Mills

---

\* Corresponding author phone: +541-737-9194; fax: +541-737-0497; e-mail: Staci.Simonich@orst.edu

1 Lake west of the Continental Divide. Hoh Lake (Olympic) is a hanging cirque lake (1384 masl)  
2 orientated on the north side of Mt. Olympus. PJ Lake (Olympic) is a hanging cirque lake (1433 masl)  
3 orientated on the northeast side of Mt. Olympus, approximately 27 km from PJ Lake. Golden Lake  
4 (Rainier) is high-altitude perched lake orientated on the west side of Mt. Rainier. LP19 (Rainier) is an  
5 unnamed high-altitude perched lake also orientated on the west side of Mt Rainier, approximately 7.5  
6 km south of Golden Lake. Snyder Lake (Glacier) is a perched cirque lake (1600 masl) located east of  
7 the Continental Divide. Oldman Lake (Glacier), a cirque lake (2026 masl), is located approximately 30  
8 km from Snyder Lake west of the Continental Divide. Wonder Lake (Denali) and McLeod Lake  
9 (Denali) are a piedmont lakes located approximately 55 km north of Mt. McKinley. Lake Matcharak  
10 (Gates) is located in the arctic tundra along the Noatak River south of the central Brooks Range. Burial  
11 Lake (Noatak) is located in the arctic and resides in the Foothills of the North Brooks Range  
12 approximately 144 km west of Lake Matcharak.

13

14 **Snowpack Collection and Analysis.** Snow sampling was conducted as described previously (1,2).  
15 Briefly, season snowpack (50 kg) was collected at the end of the snow accumulation season (March or  
16 April) into polytetrafluoroethylene (PTFE) bags from a snow pit. Samples were shipped overnight on  
17 dry ice back to the laboratory. Snow samples were shielded from light and were allowed to melt in  
18 sealed bags at 22°C overnight prior to extraction using a modified hydrophobic/hydrophilic Speedisk  
19 (*I*). Prior to extraction, 1 mL of methanol spiked with isotopically labeled deuterated polycyclic  
20 aromatic hydrocarbons (d-PAH) surrogates-ethyl acetate (EA) solution was apportioned amongst the  
21 PTFE bags to correct for PAH loss over the entire analytical method. PAHs were isolated and matrix  
22 interferences were removed using gel permeation chromatography, followed by silica gel  
23 chromatography (*I*). Extracts were concentrated (~200 µL) and spiked with an isotopically labeled d-  
24 PAH (internal standard-EA solution. Gas chromatographic mass spectrometry with electron impact  
25 ionization (GC/EI-MS) with selective ion monitoring was used for the separation, detection, and  
26 quantification of PAHs (*I*).

1  
2  
3  
4  
5  
6  
7  
8  
9  
10  
11  
12  
13  
14  
15  
16  
17  
18  
19  
20  
21  
22  
23  
24  
25  
26

**Lichen Collection and Analysis.** In brief, one lichen species was collected within a ~0.01 km<sup>2</sup> sampling area at each site. Lichens were collected from Snyder Lake catchment (*Platismatia glauca*) and Oldman Lake Catchment (*Letharia vulpine*). The lichen samples were collected upon availability at each site by hand and stored in 2-L metalized polyester bags (Kapak Corp, Minneapolis, MN). Once full, the bags were sealed with laboratory tape and double bagged in zipper-locking plastic bags. The samples were stored and shipped overnight to the laboratory in coolers with ice and then stored at -40°C until analysis. The samples were ground using a Büchi Mixer B-400 (Büchi-Mixer B-400, Flawil, Switzerland), packed in 100 mL Accelerated Solvent Extractor (ASE) cells (Dionex, Sunnyvale, CA), spiked with d-PAH surrogates solution, and extracted using pressurized liquid extraction. Lichen samples were extracted twice using an ASE 300 and dichloromethane (100 °C, 1500 psi, 1 cycles of 5 minutes, 75% flush volume). Extract cleanup steps, isotopically-labeled surrogate and internal standard spikes, separation, detection, and quantification (GC/EI-MS) were the same as described above.

**Sediment Collection, Dating, and Analysis.** Sediment sampling was conducted as described previously (3). Briefly, at least two sediment cores were collected from the deepest area of the lake using an Uwitec gravimetric corer and 78 mm polycarbonate core tube. Sediment cores were extruded vertically and sectioned in the field, 0.5 cm intervals for first 10 cm and 1 cm intervals thereafter. Intervals were stored separately in pre-cleaned glass jars. Sediment samples were kept on blue ice and shipped overnight to the laboratory. Sediment cores were identified for SOC analysis based on visual inspection of the sediment core, followed by <sup>210</sup>Pb dating. Intervals from within a sediment core were identified based on <sup>210</sup>Pb dating and contaminant use profiles. An aliquot from each sediment core interval was analyzed for percent moisture, total organic carbon (TOC), and <sup>210</sup>Pb, <sup>137</sup>Cs, <sup>226</sup>Ra, and <sup>241</sup>Am activity. <sup>210</sup>Pb, <sup>137</sup>Cs, <sup>226</sup>Ra, and <sup>241</sup>Am were analyzed by direct gamma assay at the Liverpool University Environmental Radioactivity Laboratory, using an Ortec HPGe GWL series well-type coaxial low background intrinsic germanium detector (4). Radiodating of <sup>210</sup>Pb and <sup>226</sup>Ra was determined by

1 the gamma emissions at 46.5 keV and 295 keV, respectively. Complete details of these analyses are  
2 provided elsewhere (3,4). The constant rate of supply model, along with measured  $^{210}\text{Pb}$  activity, was  
3 used to determine the sedimentation rate and average date of each interval (4-6). The total and  
4 supported  $^{210}\text{Pb}$  activity for each core, along with the  $^{137}\text{Cs}$  concentrations versus depth are provided in  
5 Figure S2 and S15.

6 The extraction, isolation, and quantification of PAHs in sediment is described elsewhere (3). In  
7 brief, wet sediment (10-40 g ww) was dried with sodium sulfate and extracted using pressurized liquid  
8 extraction. Prior to extraction, samples were spiked with an isotopically labeled recovery surrogates to  
9 correct for PAH loss over the analytical method. Extracts were purified using the gel permeation  
10 chromatography and silica gel chromatography (3). Extract cleanup steps, isotopically-labeled surrogate  
11 and internal standard spikes, separation, detection, quantification (GC/EI-MS), recoveries, and WACAP  
12 quality assurance objectives have been previously described (3,7). The sediment extracts were analyzed  
13 for target PAHs by GC/MS, using electron impact (EI) ionization with selective ion monitoring as  
14 described in by Usenko et al (3).

15 Sodium sulfate was used as the laboratory blank and was carried through the entire analytical  
16 method (extraction, cleanup, and concentrating), starting at the grinding step, the laboratory blank was  
17 spiked with the same quantity of isotopically labeled surrogate and internal standards as samples (3).  
18 PAH concentrations in sediment were surrogate recovery (concentration calculated relative to surrogate)  
19 and laboratory blank corrected.

20

21 **Sediment Focusing Correction.** Focusing factors (FF) were calculated for each sediment core in order  
22 to correct for sediment focusing. Focusing factors are used to quantify sedimentation enhancement or  
23 reduction at the coring site. The  $^{210}\text{Pb}$  inventory was derived by plotting the unsupported  $^{210}\text{Pb}$  against  
24 the mass sedimentation accumulation rate (8) and the  $^{210}\text{Pb}$  atmospheric fallout was modeled from ice  
25 cores, soil samples, and atmospheric collectors near sampling sites (9-13).  $^{210}\text{Pb}$  atmospheric fallout  
26 may vary over short time periods and in mountainous terrain, where precipitation varies greatly with

1 elevation and orientation. However, over the time frame of these sediment cores (<150 years), the <sup>210</sup>Pb  
2 atmospheric fallout is considered to be fairly constant in a regional context (4,14). The lake sediment  
3 core FFs ranged from 0.78 to 4.55 (Table S1). In order to compare the spatial and temporal trends of  
4 PAH deposition among different sediment cores, all sediment PAH concentrations were multiplied by  
5 the lake sedimentation rate and normalized to the FF. This converted all PAH concentrations in  
6 sediment ( $\mu\text{g g}^{-1}$  dry wt) to focus-corrected PAH fluxes ( $\mu\text{g m}^{-2} \text{y}^{-1}$ ).

7

8

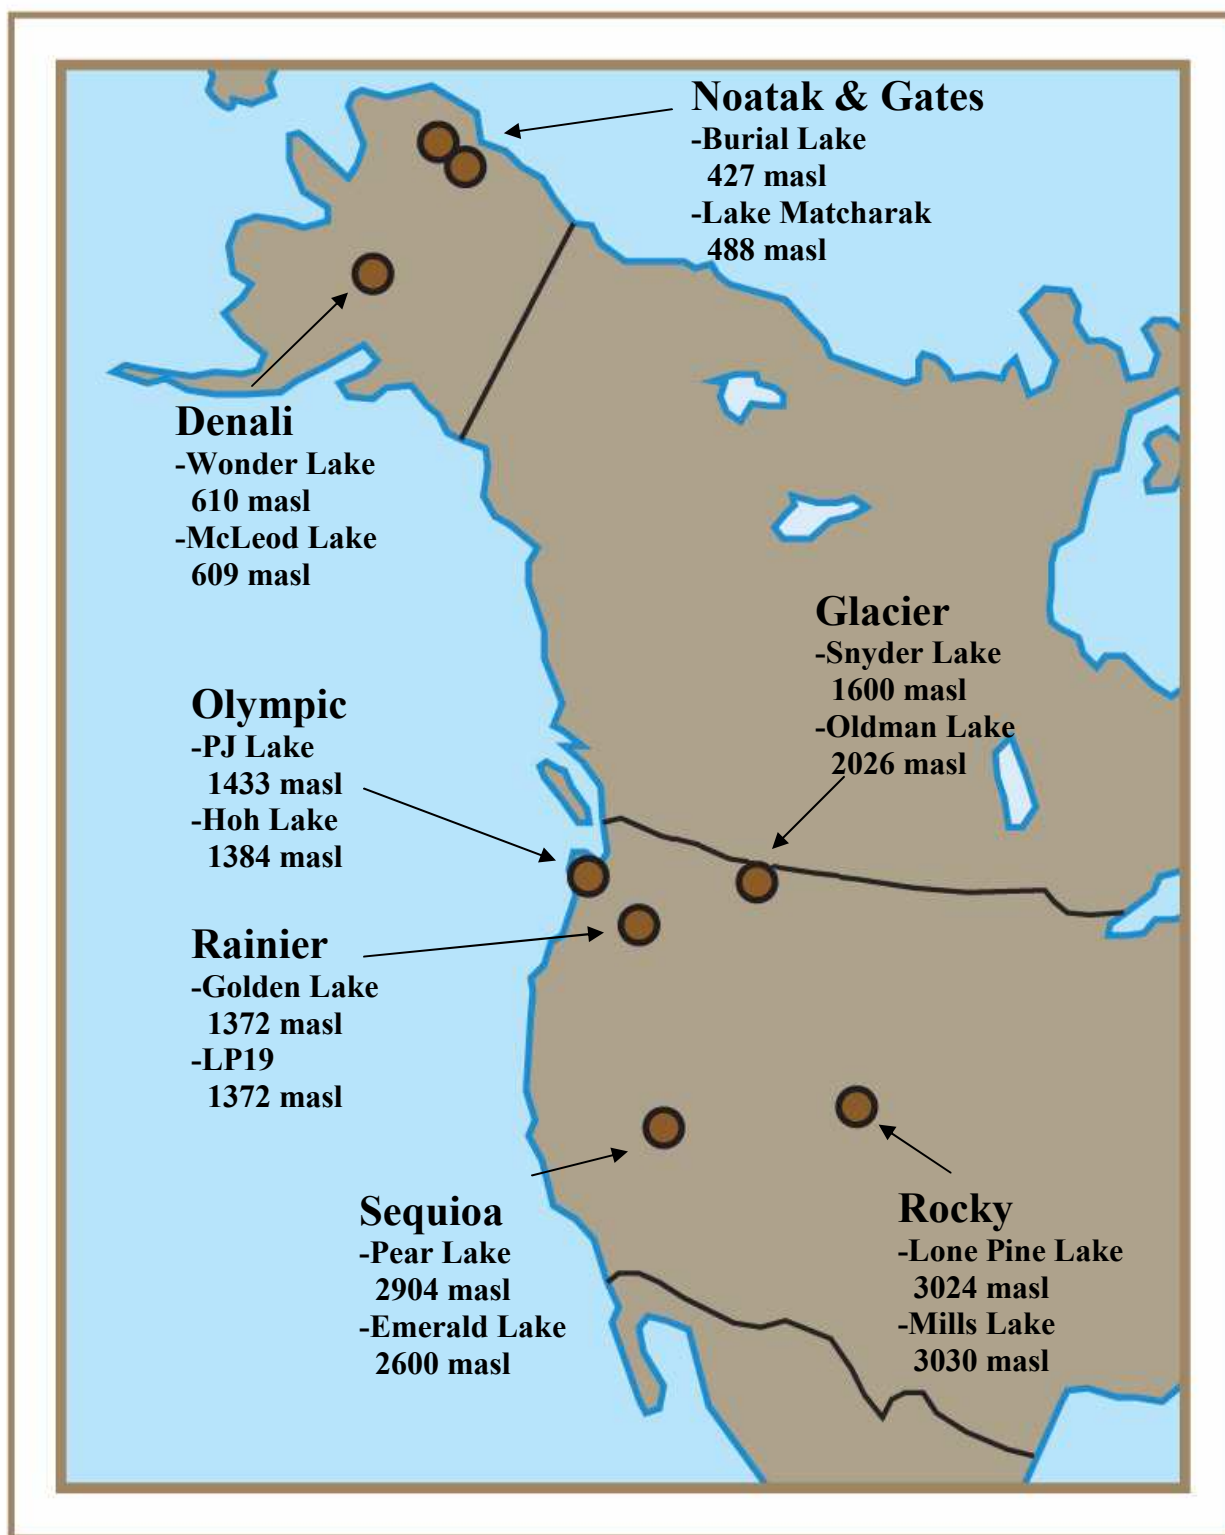

**Figure S1.** Location of National Parks sampled. Meters above sea level is denoted with masl.

1  
 2  
 3  
 4  
 5  
 6  
 7

1  
2  
3  
4  
5

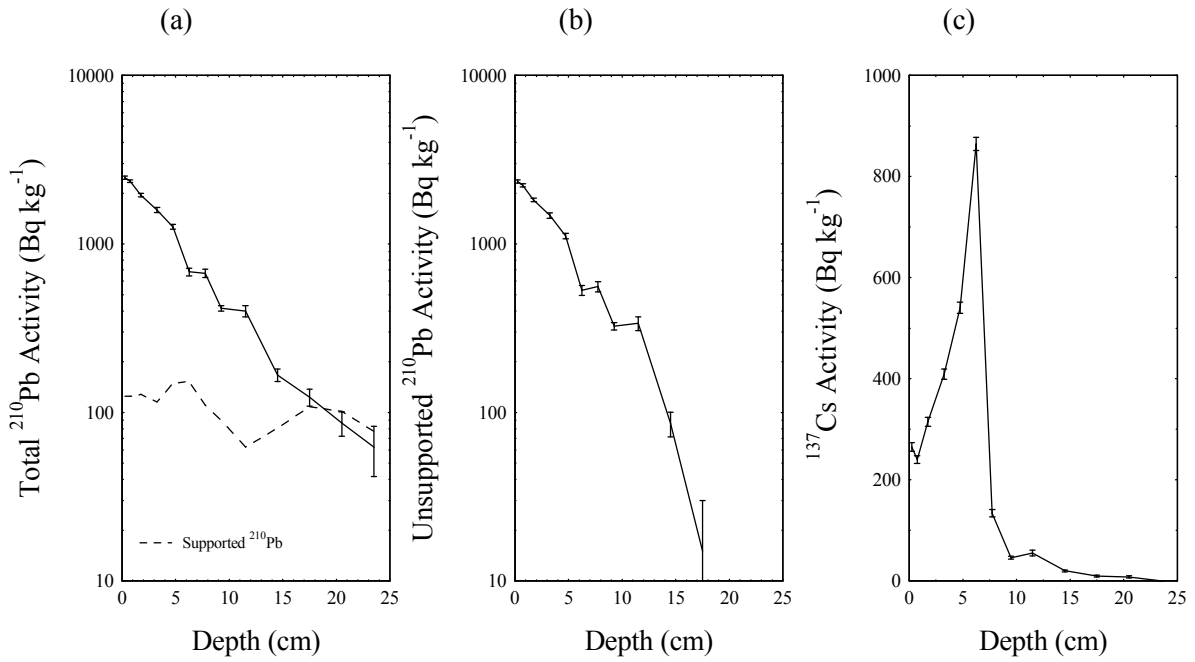

6

7 **Figure S2:** Fallout radionuclides in Pear Lake core showing (a) total and supported  $^{210}\text{Pb}$ ,  
8 (c)  $^{137}\text{Cs}$  concentrations versus depth.

9

10

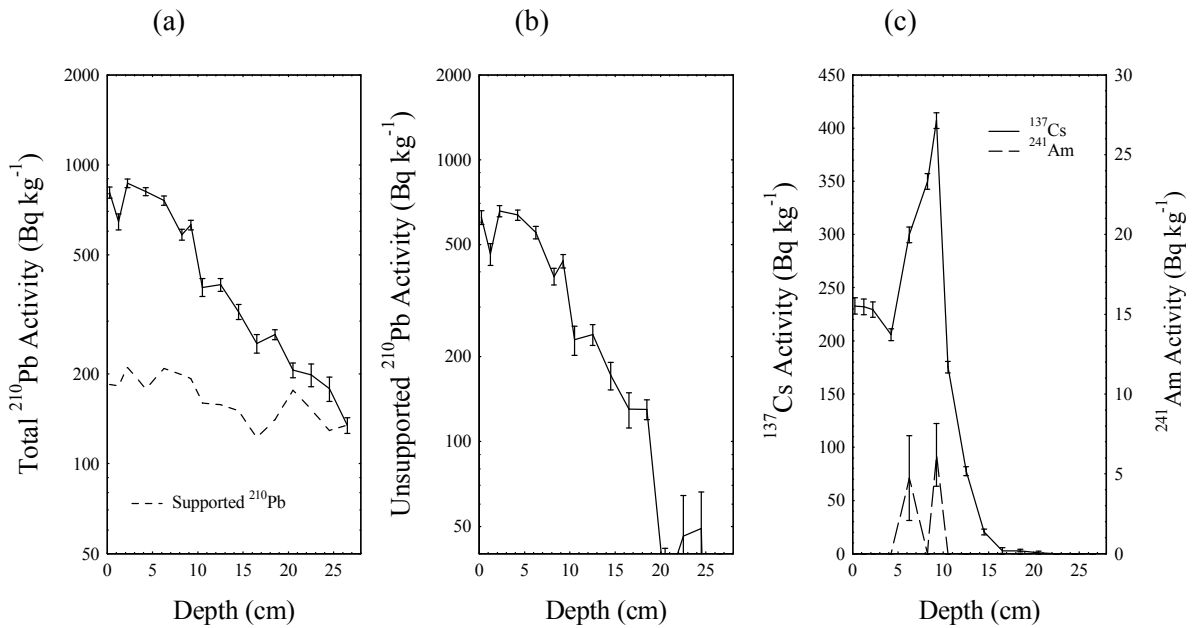

11

12 **Figure S3:** Fallout radionuclides in Emerald Lake core showing (a) total and supported  $^{210}\text{Pb}$ ,  
13  $^{210}\text{Pb}$ , (c)  $^{137}\text{Cs}$  and  $^{241}\text{Am}$  concentrations versus depth.

14

15

16

17

18

19

1  
2  
3  
4  
5

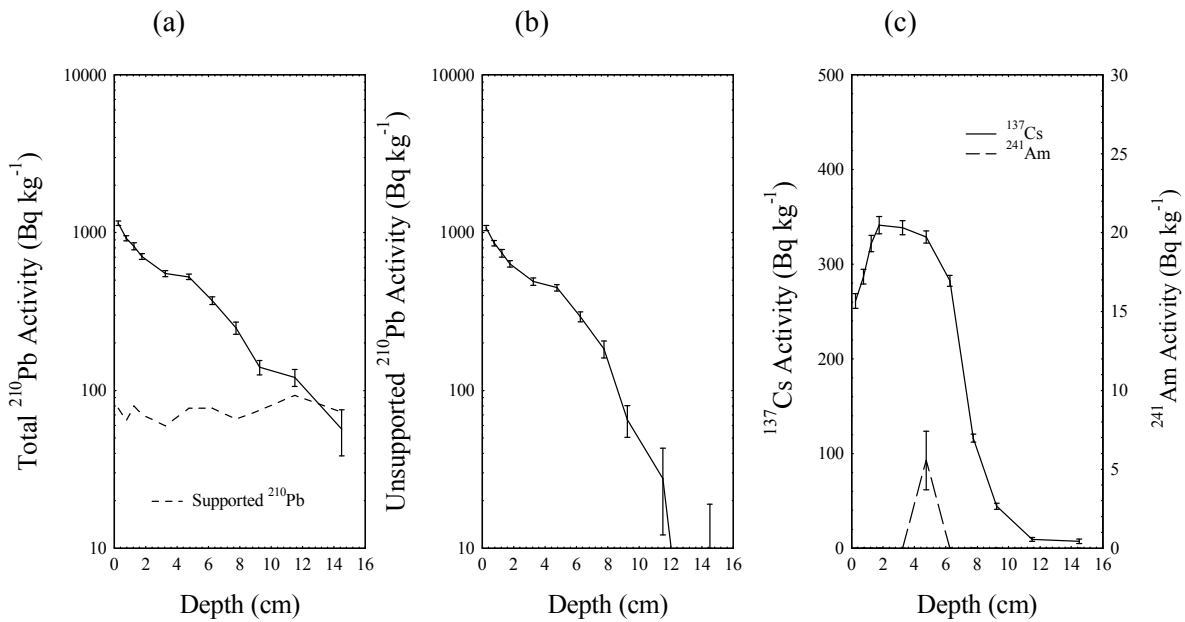

6

7 **Figure S4:** Fallout radionuclides in Lone Pine Lake core showing (a) total and supported  $^{210}\text{Pb}$ , (b) unsupported  
8  $^{210}\text{Pb}$ , (c)  $^{137}\text{Cs}$  and  $^{241}\text{Am}$  concentrations versus depth.

9

10  
11

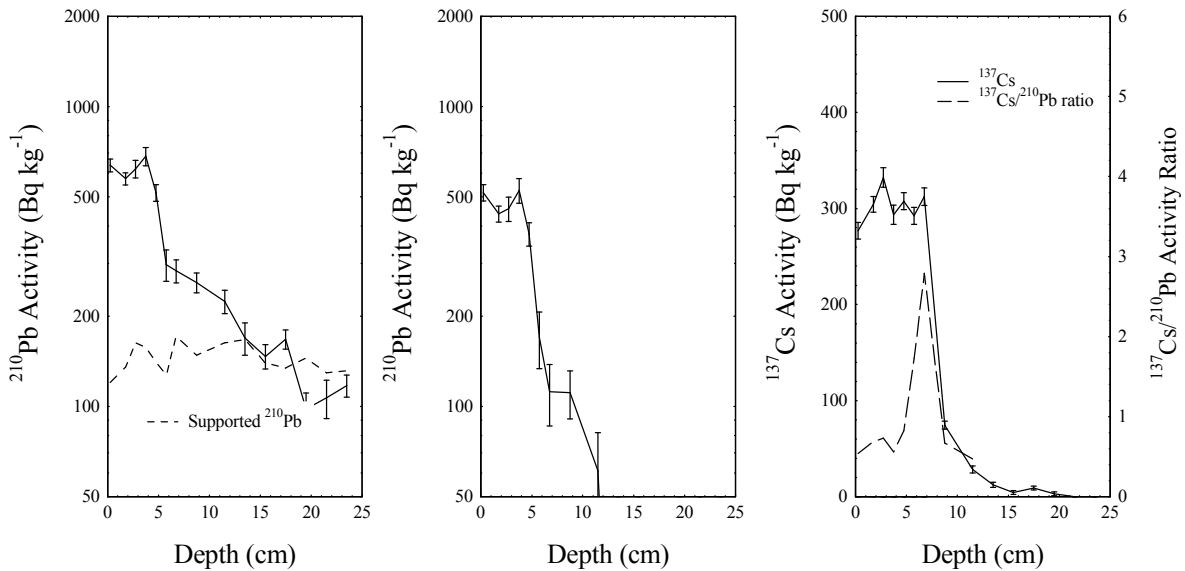

12

13 **Figure S5:** Fallout radionuclides in Mills Lake core showing (a) total and supported  $^{210}\text{Pb}$ , (b) unsupported  
14  $^{210}\text{Pb}$ , (c)  $^{137}\text{Cs}$  concentrations and  $^{137}\text{Cs}/^{210}\text{Pb}$  activity ratios versus depth.

15  
16  
17  
18  
19  
20



1  
2  
3  
4

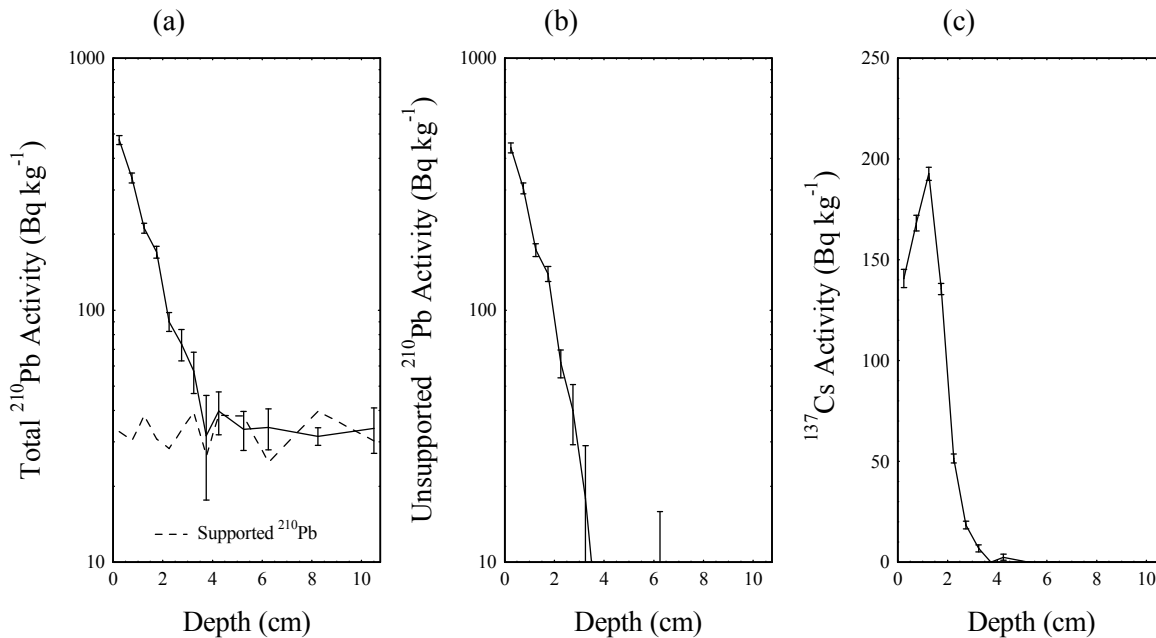

5  
6  
7  
8  
9  
10  
11

**Figure S6:** Fallout radionuclides in Burial Lake core showing (a) total and supported  $^{210}\text{Pb}$ , (b) unsupported  $^{210}\text{Pb}$ , (c)  $^{137}\text{Cs}$  and  $^{241}\text{Am}$  concentrations versus depth.

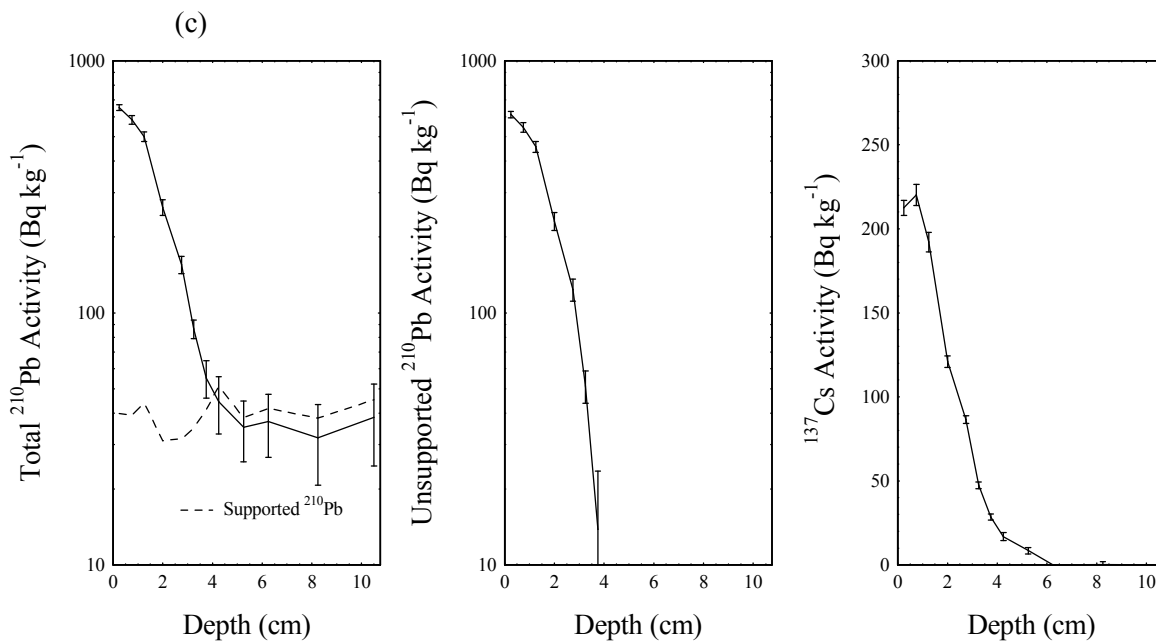

12  
13  
14  
15  
16  
17  
18  
19

**Figure S7:** Fallout radionuclides in Wonder Lake core showing (a) total and supported  $^{210}\text{Pb}$ , (b) unsupported  $^{210}\text{Pb}$ , (c)  $^{137}\text{Cs}$  and  $^{241}\text{Am}$  concentrations versus depth.

1  
2  
3  
4

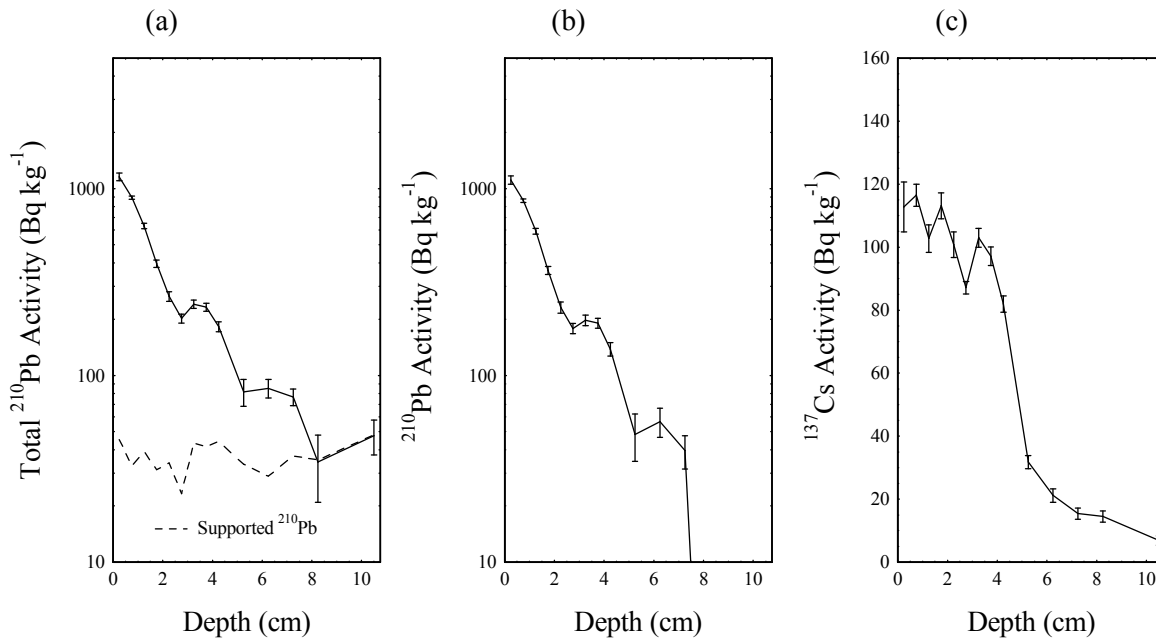

5  
6  
7  
8  
9  
10  
11

**Figure S8:** Fallout radionuclides in McLeod Lake core showing (a) total and supported  $^{210}\text{Pb}$ , (b) unsupported  $^{210}\text{Pb}$ , (c)  $^{137}\text{Cs}$  concentrations versus depth.

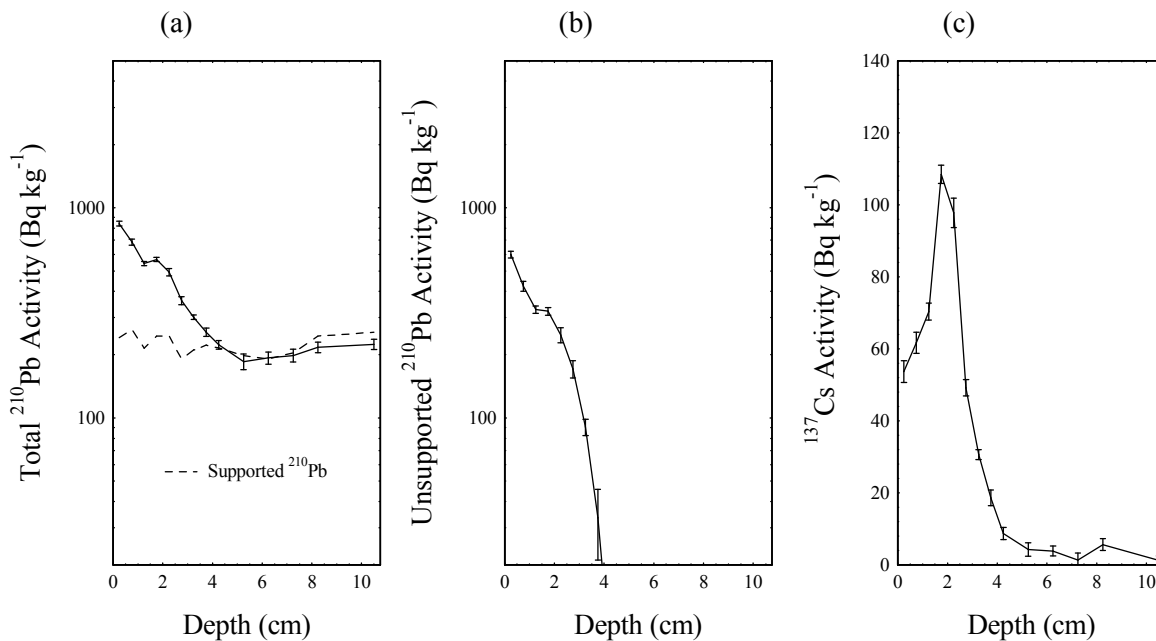

12  
13  
14  
15  
16  
17  
18  
19

**Figure S9:** Fallout radionuclides in Matcharak Lake core showing (a) total and supported  $^{210}\text{Pb}$ , (b) unsupported  $^{210}\text{Pb}$ , (c)  $^{137}\text{Cs}$  concentrations versus depth.

1

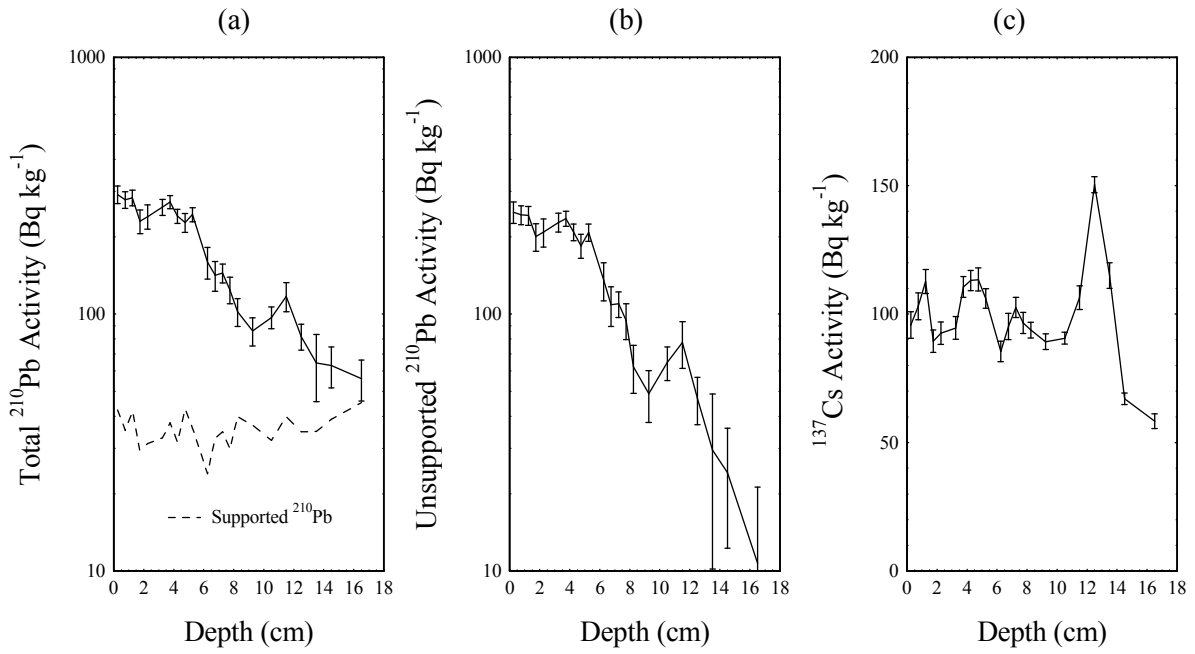

2

3

4 **Figure S10:** Fallout radionuclides in PJ Lake core showing (a) total and supported  $^{210}\text{Pb}$ , (b) unsupported  $^{210}\text{Pb}$ ,  
5 (c)  $^{137}\text{Cs}$  concentrations versus depth.

6

7

8

9

10

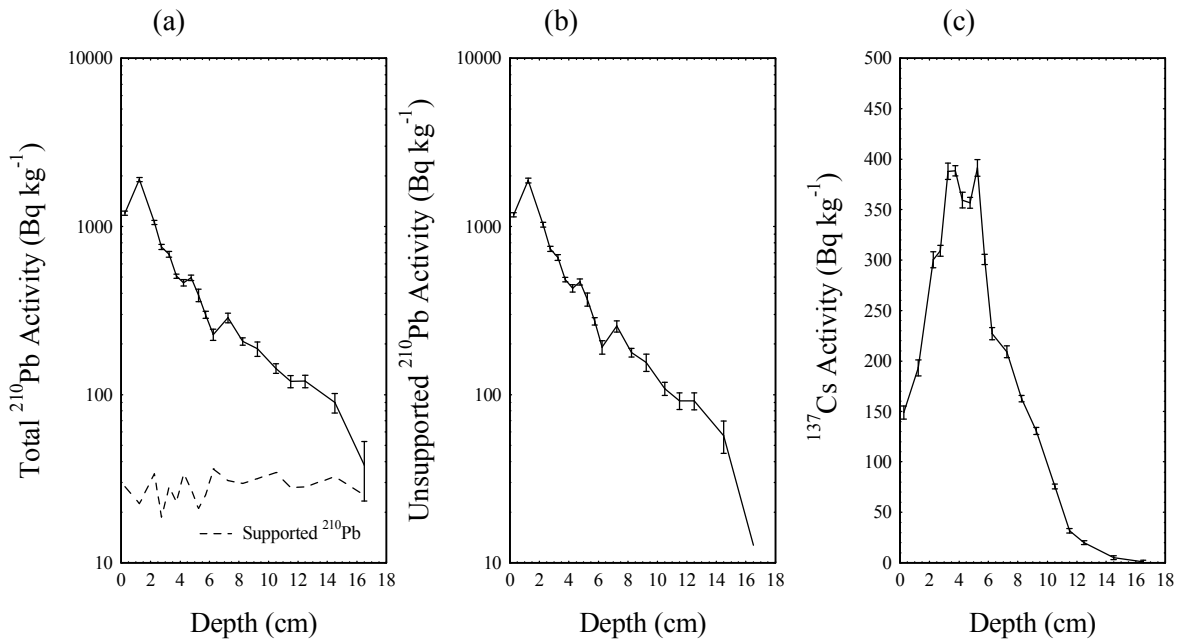

11

12 **Figure S11:** Fallout radionuclides in Hoh Lake core showing (a) total and supported  $^{210}\text{Pb}$ , (b) unsupported  
13  $^{210}\text{Pb}$ , (c)  $^{137}\text{Cs}$  concentrations versus depth.

14

15

16

17

18

1  
2  
3

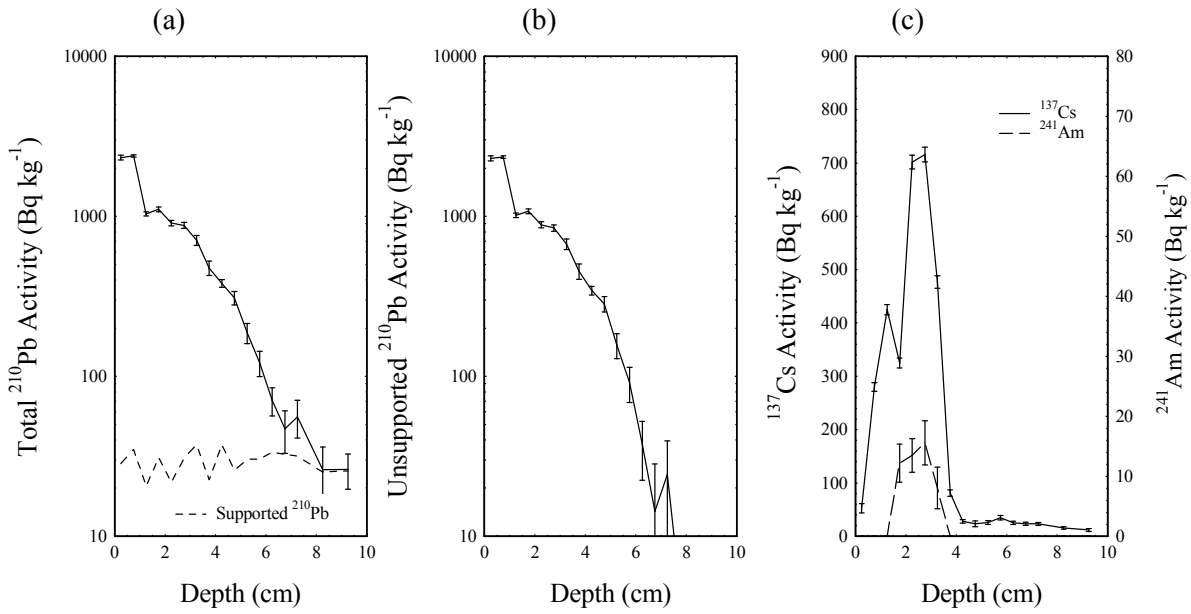

4  
5  
6  
7  
8  
9  
10  
11  
12

**Figure S12:** Fallout radionuclides in Golden Lake core showing (a) total and supported  $^{210}\text{Pb}$ , (b) unsupported  $^{210}\text{Pb}$ , (c)  $^{137}\text{Cs}$  and  $^{241}\text{Am}$  concentrations versus depth.

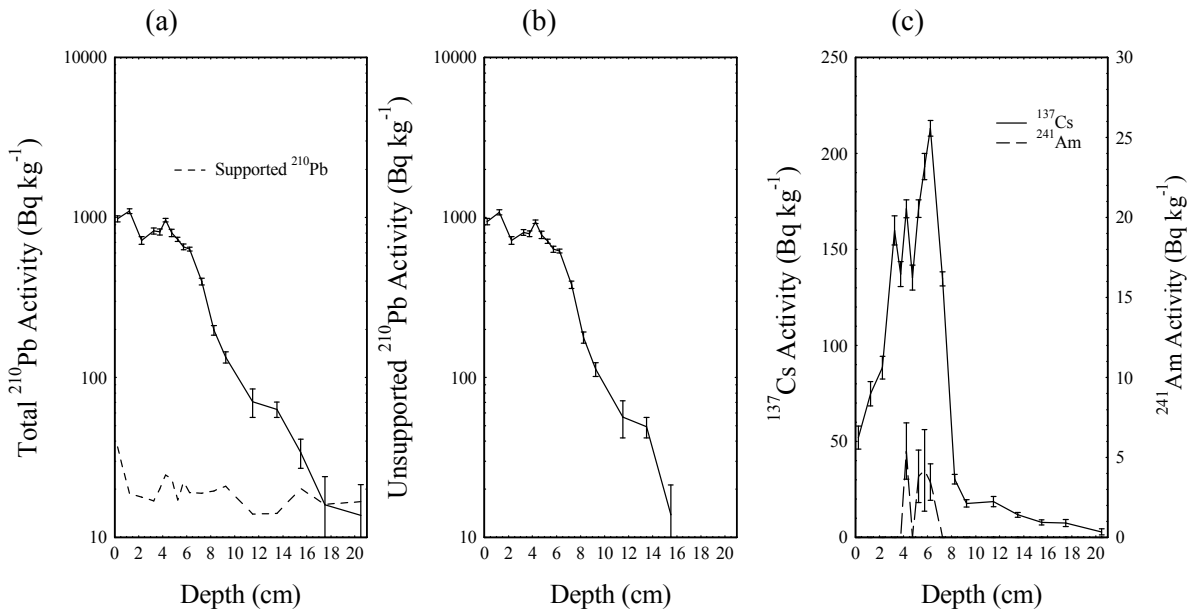

13  
14  
15  
16  
17  
18  
19  
20  
21

**Figure S13:** Fallout radionuclides in LP19 Lake core showing (a) total and supported  $^{210}\text{Pb}$ , (b) unsupported  $^{210}\text{Pb}$ , (c)  $^{137}\text{Cs}$  and  $^{241}\text{Am}$  concentrations versus depth.

1  
2  
3  
4

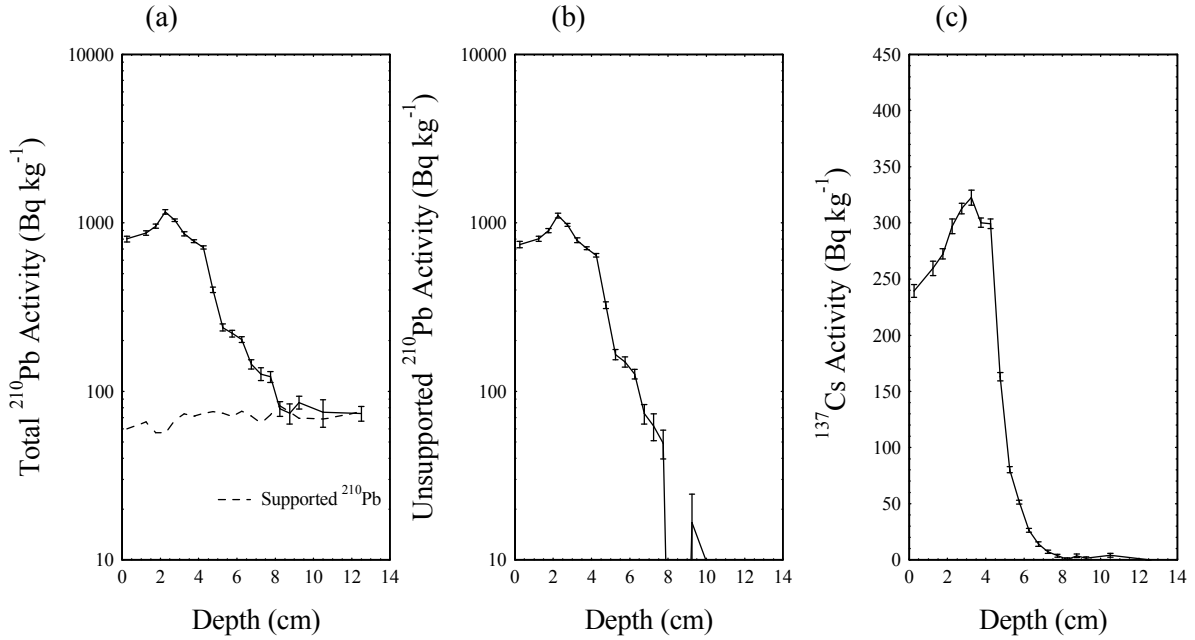

5

6 **Figure S14:** Fallout radionuclides in Oldman Lake core showing (a) total and supported  $^{210}\text{Pb}$ , (b) unsupported  
7  $^{210}\text{Pb}$ , (c)  $^{137}\text{Cs}$  concentrations versus depth.

8

9

10

11

12

13

14

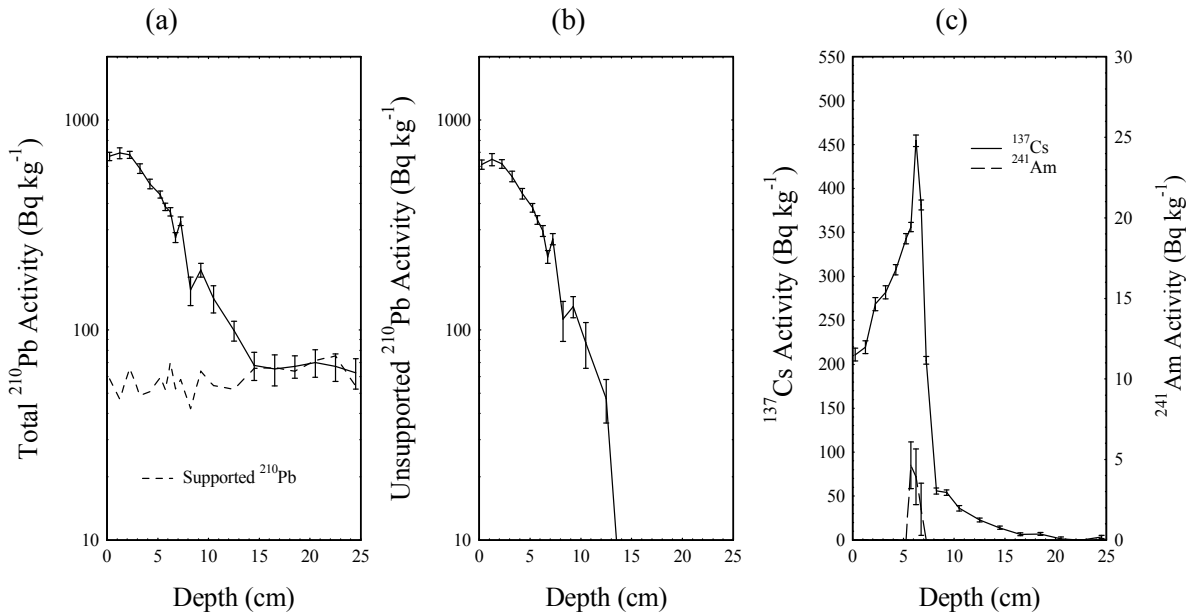

15

16 **Figure S15:** Fallout radionuclides in Snyder Lake core showing (a) total and supported  $^{210}\text{Pb}$ , (b) unsupported  
17  $^{210}\text{Pb}$ , (c)  $^{137}\text{Cs}$  and  $^{241}\text{Am}$  concentrations versus depth.

18

19

20

1  
2

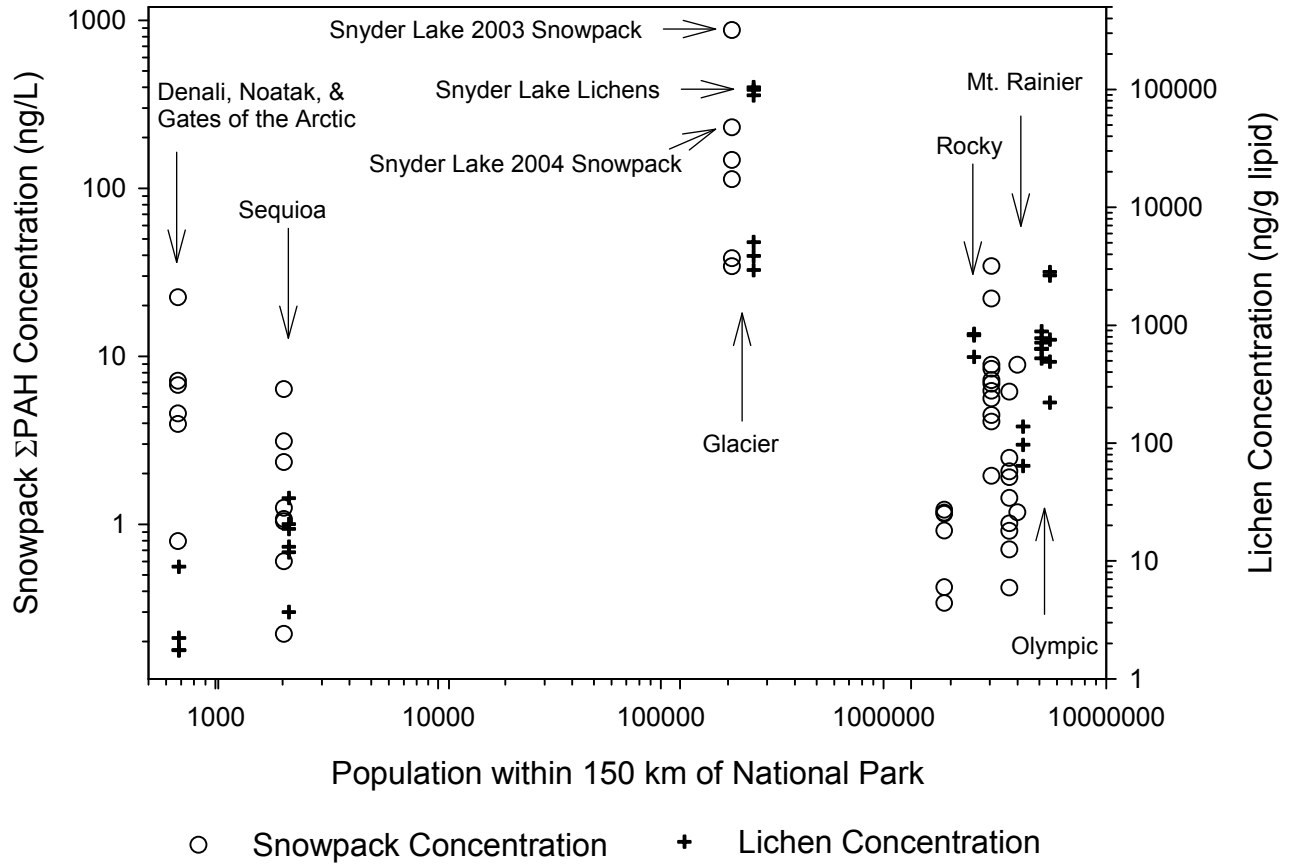

3  
4  
5  
6  
7  
8  
9  
10  
11

**Figure S16:** Snowpack and lichen  $\Sigma$ PAH concentrations versus population within 150 km of WACAP national parks.

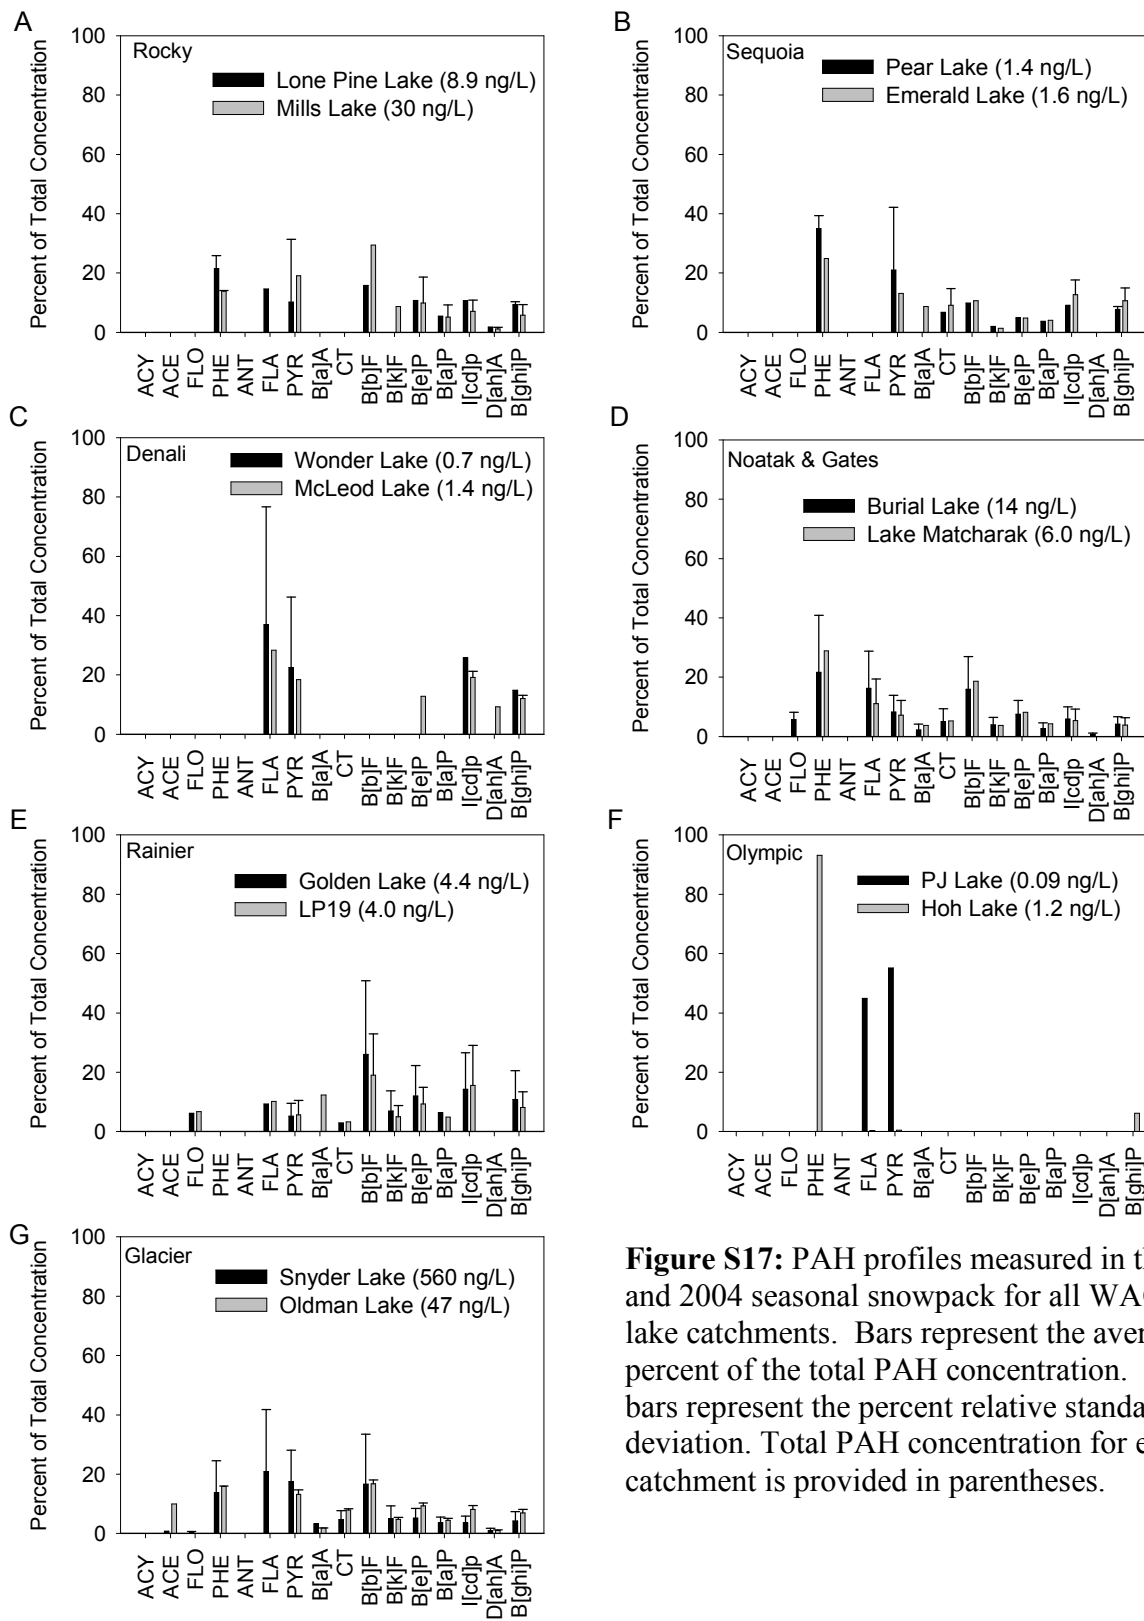

**Figure S17:** PAH profiles measured in the 2003 and 2004 seasonal snowpack for all WACAP lake catchments. Bars represent the average percent of the total PAH concentration. Error bars represent the percent relative standard deviation. Total PAH concentration for each lake catchment is provided in parentheses.

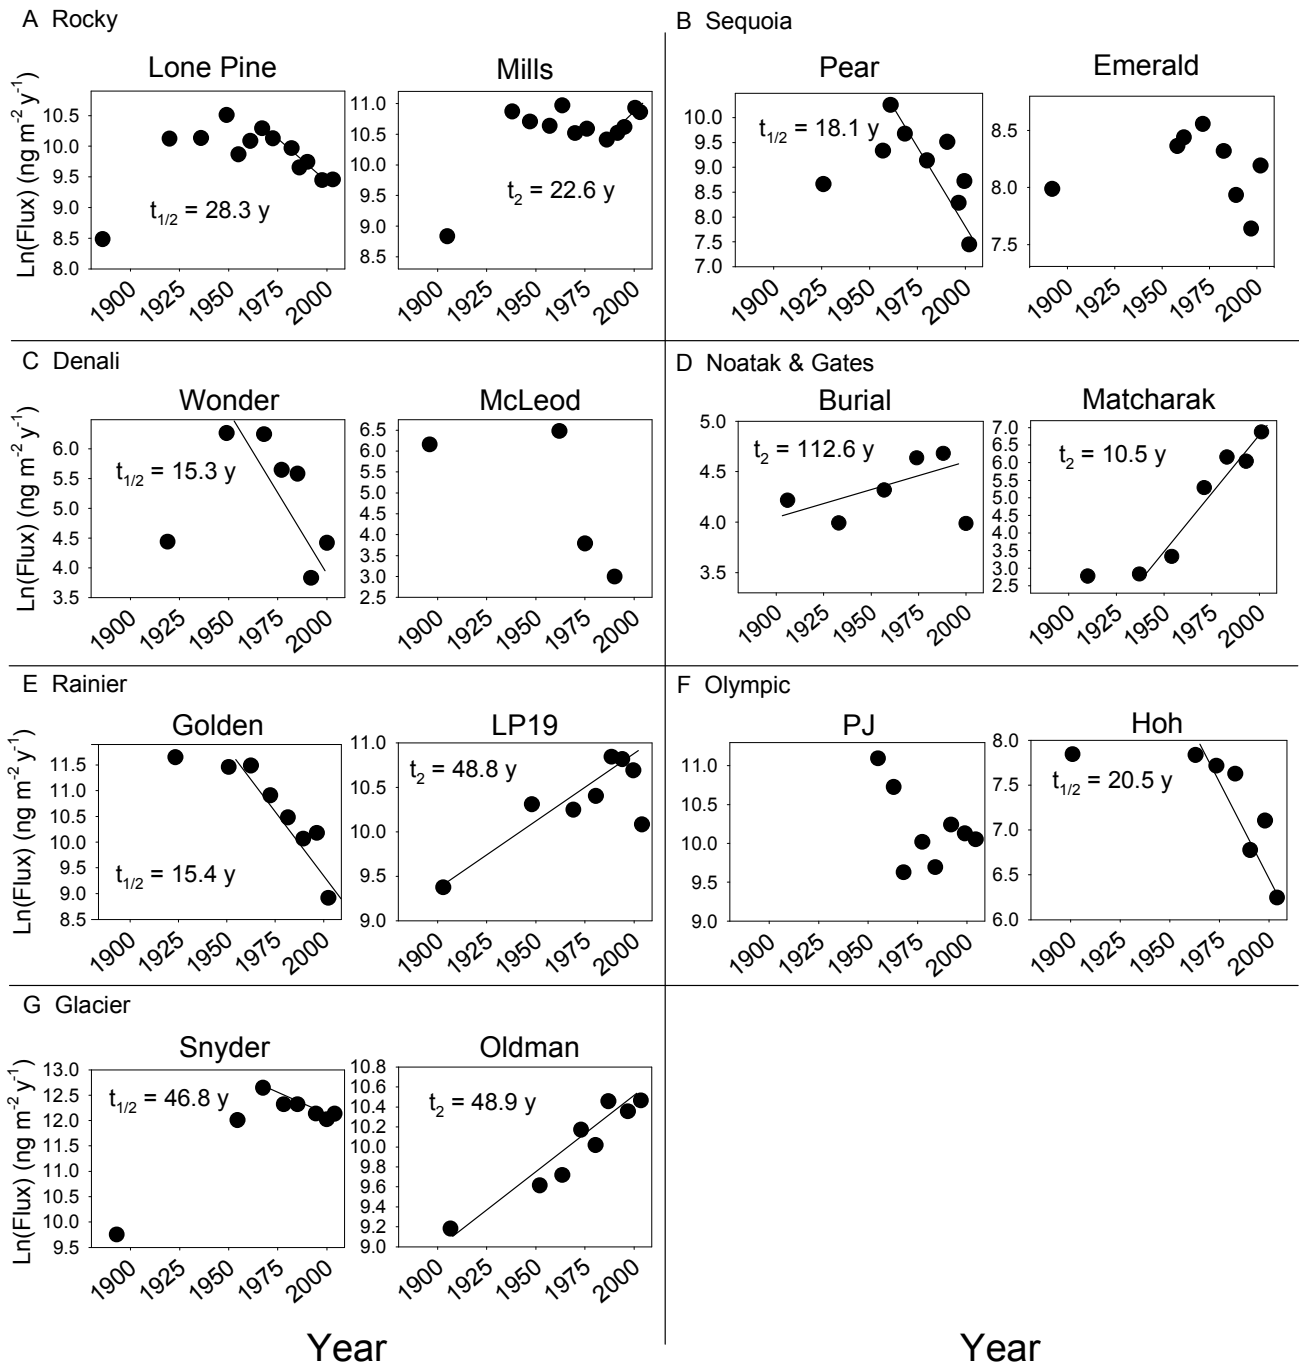

**Figure S18.** Natural log focus-corrected flux ( $\text{ng m}^{-2} \text{y}^{-1}$ ) profiles of PAHs in WACAP sediment cores. Doubling times ( $t_2$ ) and half-lives ( $t_{1/2}$ ) are given where least squares regressions were statistically significant ( $p < 0.05$ ).

1  
2  
3  
4  
5  
6  
7  
8  
9  
10  
11  
12  
13



1 A

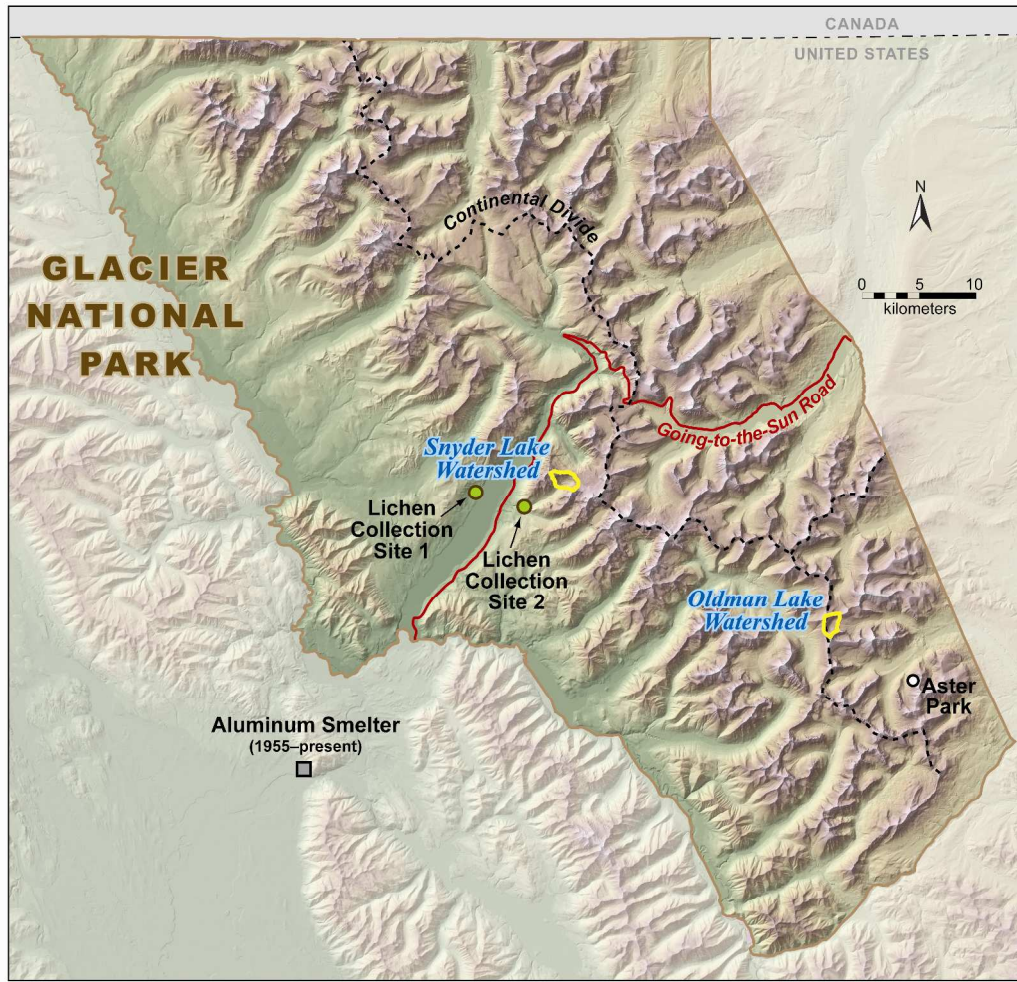

2  
3  
4

B

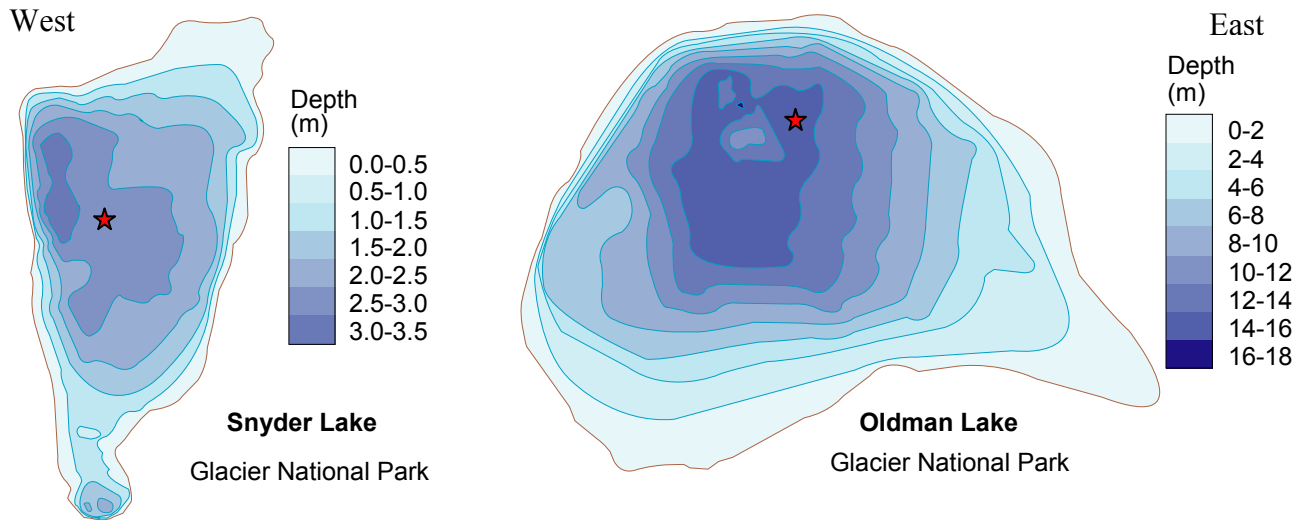

5  
6  
7  
8  
9  
10

**Figure S19.** A) Map of Glacier National Park, MT. Brown line indicates park boundary and yellow lines indicate lake catchment. B) Lake bathymetry maps for Snyder Lake (west) and Oldman Lake (east). Stars indicate coring site location with in lake.

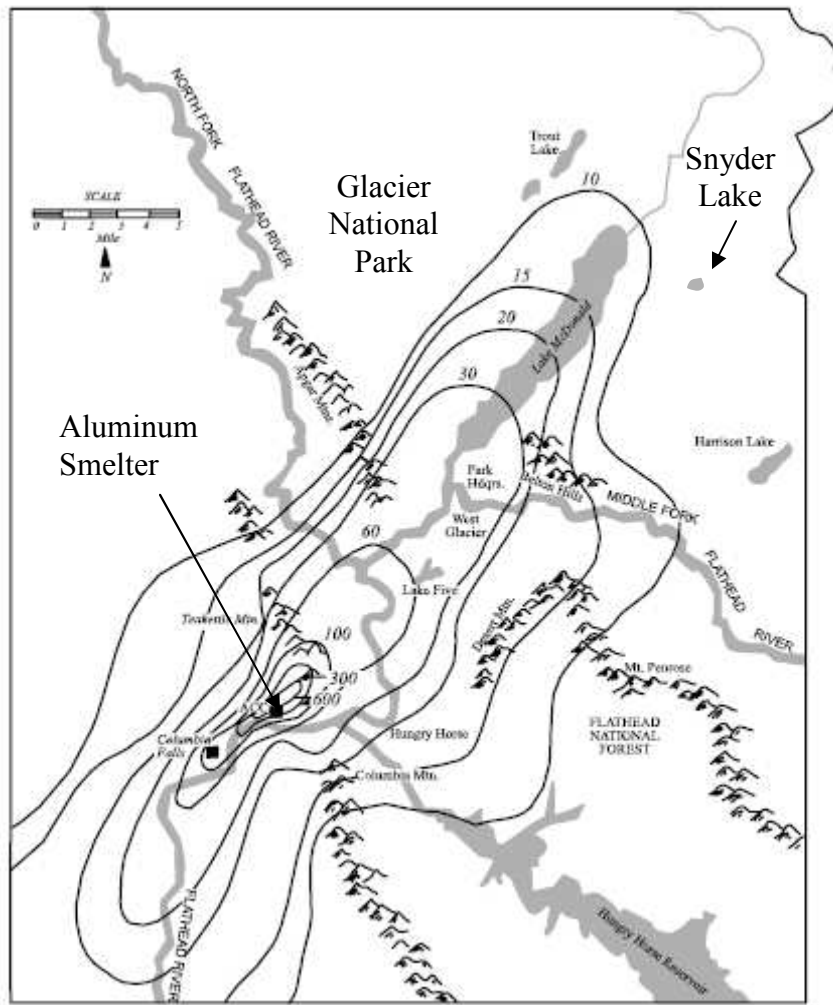

**Figure S20:** Isolines of fluoride (ppb) measured in foliage samples taken along transects from aluminum smelter in 1970 from reference (15).

2  
3  
4  
5  
6  
7  
8  
9  
10

A

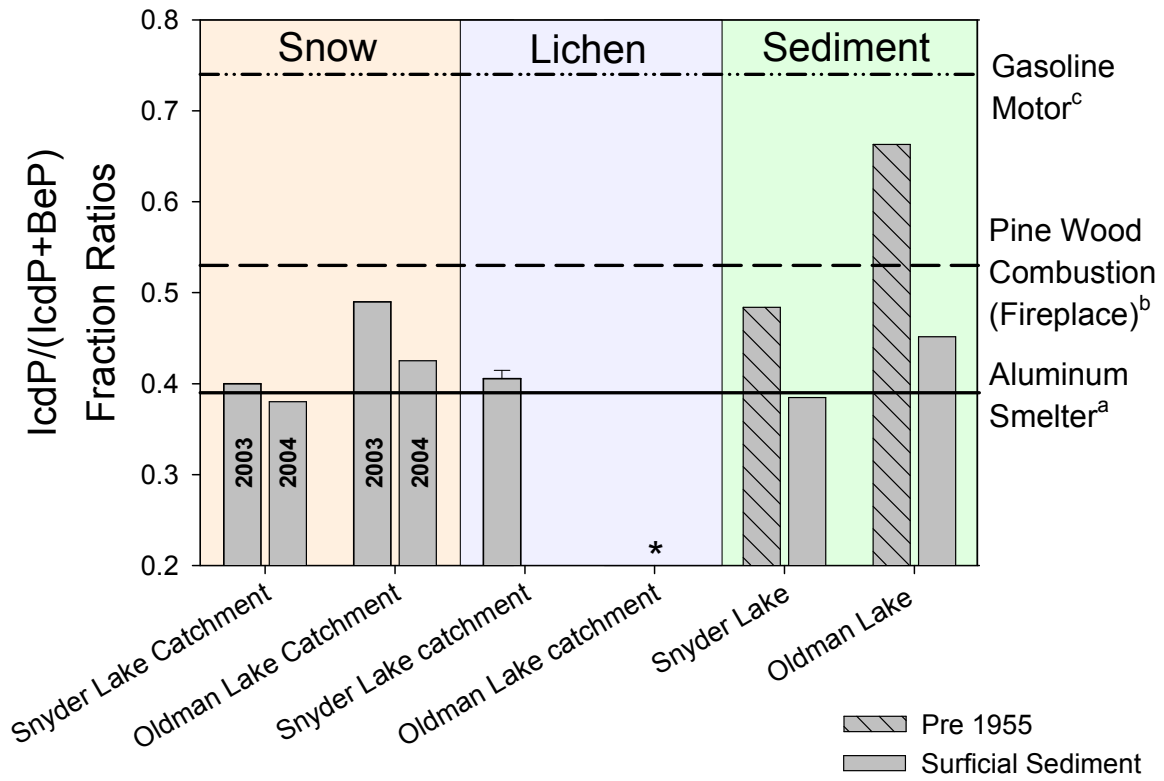

B

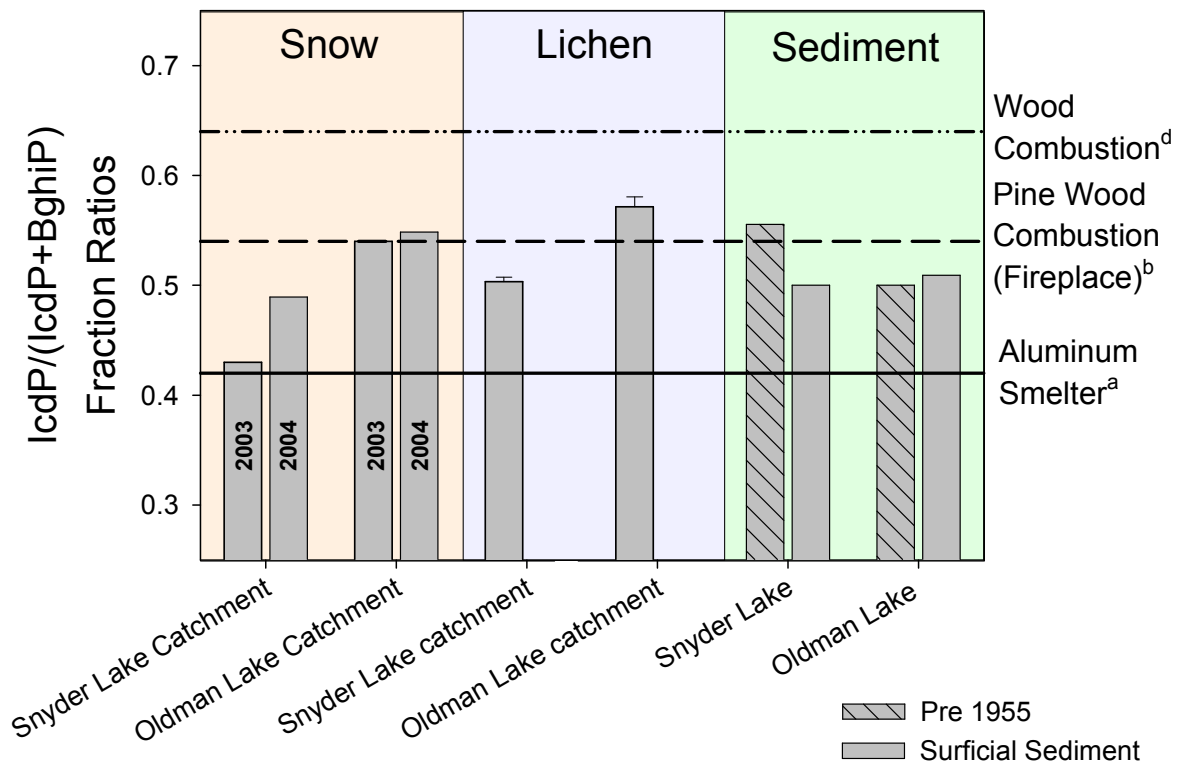

1  
2  
3  
4  
5  
6  
7

**Figure S21: A)** IcdP/(IcdP+BeP) and **B)** IcdP/(IcdP+BghiP) fraction ratio (average  $\pm$  standard deviation) calculated from seasonal snowpack, lichen, and pre 1955 and surficial sediment cores intervals for lake catchments in Glacier National Park. <sup>a</sup> reference (16), <sup>b</sup> reference (17), <sup>c</sup> reference (18), and <sup>d</sup> reference (19). \* indicates concentration was below detection limits.

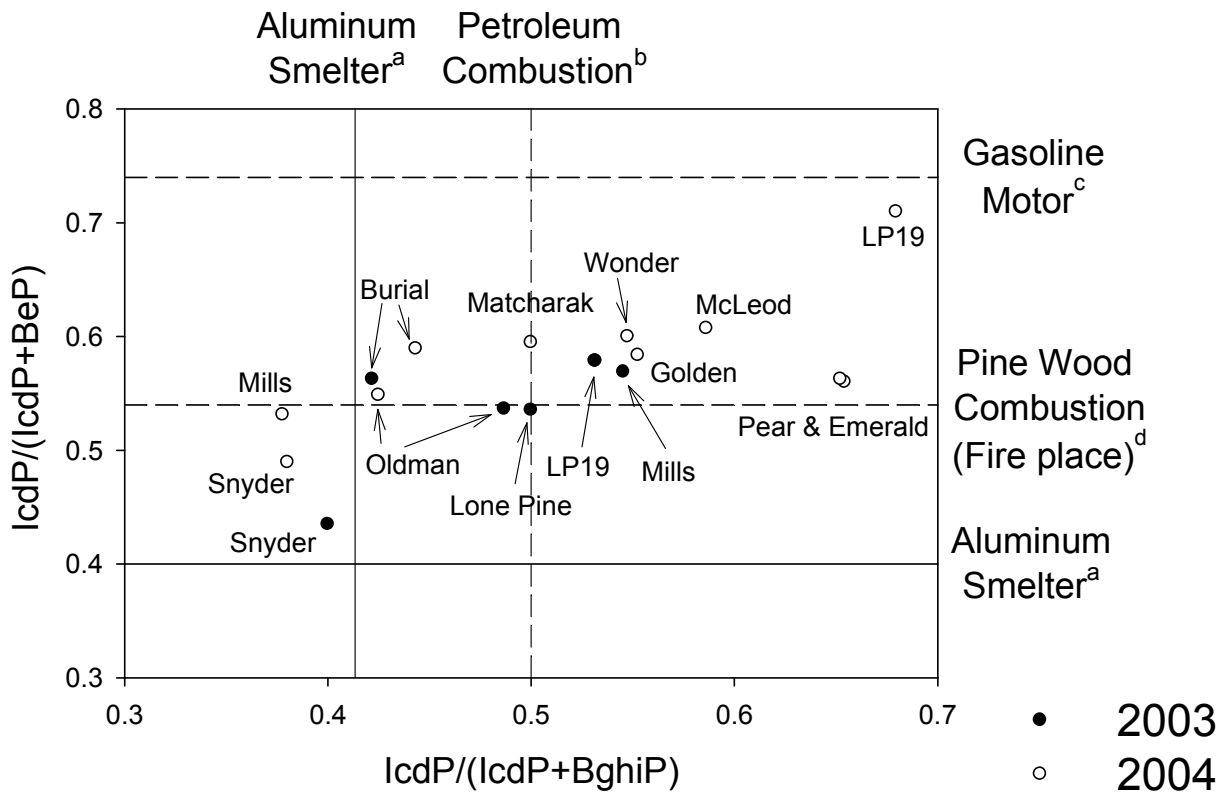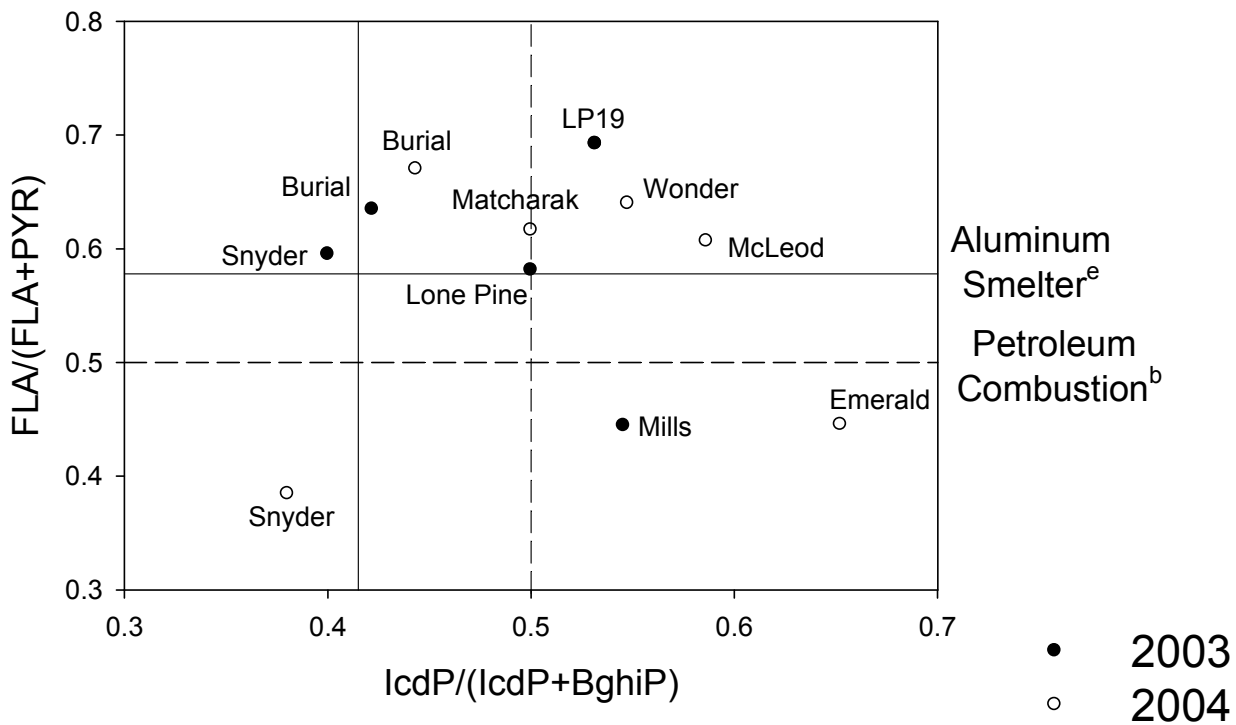

1  
2 **Figure S22:** Ratios of Ind/(Ind+BeP), IcdP/(IcdPd+BghiP), and FLA/(FLA+PYR) calculated from all  
3 2003 and 2004 season snowpack samples. Dashed lines (---) indicate the PAH ratio of a  
4 specific PAH source. Solid lines (—) indicate the PAH ratio from an aluminum smelter using  
5 Söderberg technology. <sup>a</sup> reference (16), <sup>b</sup> reference (19), <sup>c</sup> reference (17), <sup>d</sup> reference (18), and <sup>e</sup>  
6 reference (20).  
7

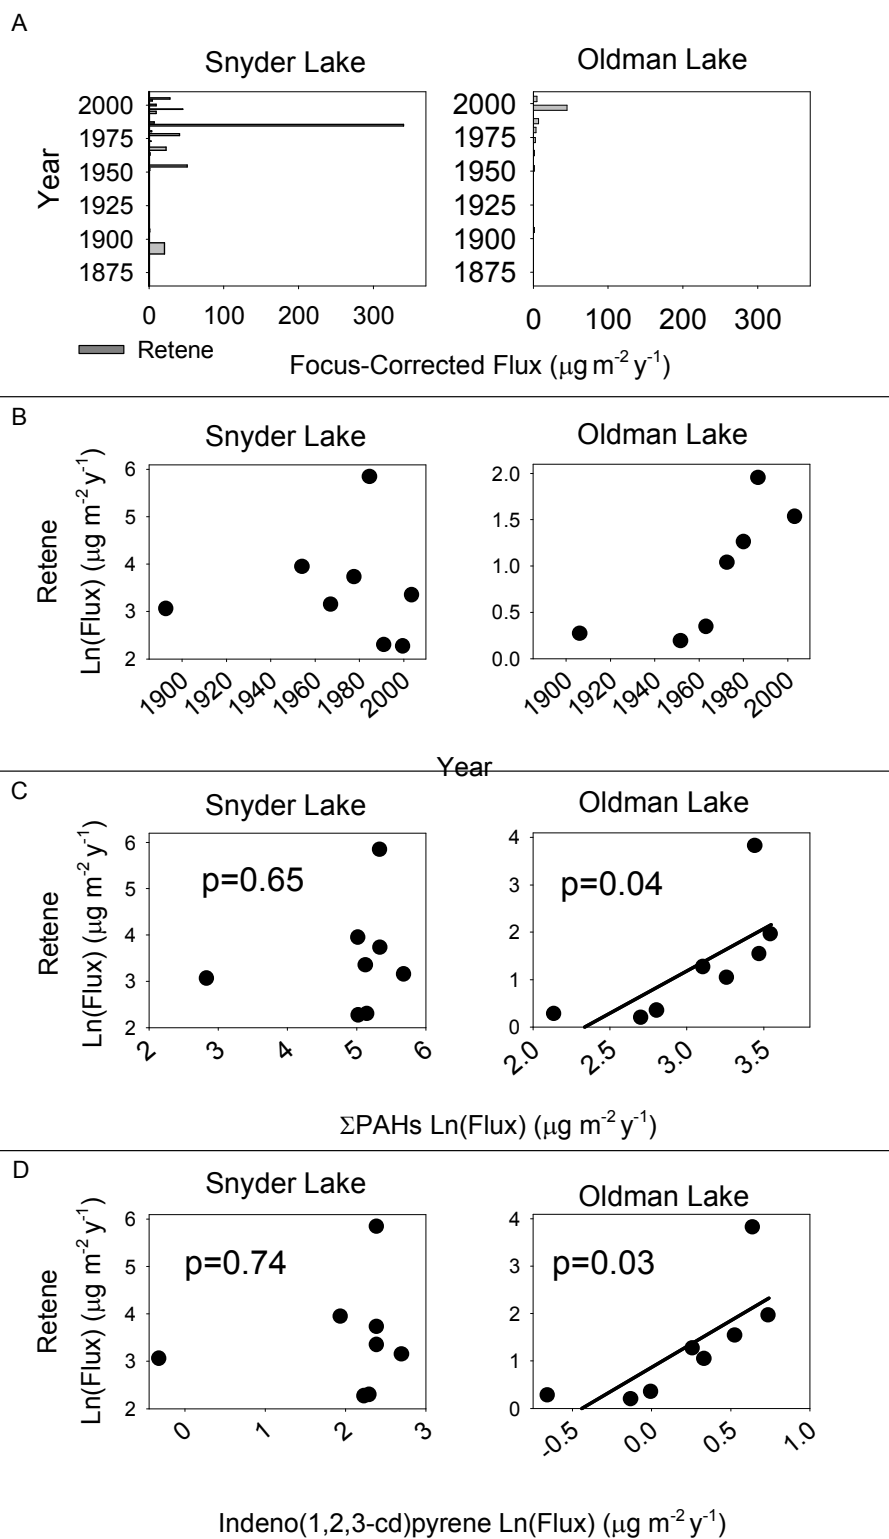

**Figure S23: A)** Focus-corrected flux ( $\mu\text{g m}^{-2} \text{y}^{-1}$ ) profiles of retene in Oldman Lake (east) and Snyder Lake (west) sediment core. **B)** Natural log focus-corrected flux ( $\mu\text{g m}^{-2} \text{y}^{-1}$ ) profiles of retene in Oldman Lake and Snyder Lake sediment core. **C)** Natural log focus-corrected flux ( $\mu\text{g m}^{-2} \text{y}^{-1}$ ) profiles of retene versus  $\Sigma\text{PAHs}$  in Oldman Lake and Snyder Lake sediment core. **D)** Natural log focus-corrected flux ( $\mu\text{g m}^{-2} \text{y}^{-1}$ ) profiles of retene versus indeno(1,2,3-cd)pyrene in Oldman Lake and Snyder Lake sediment core.

1  
2  
3  
4  
5  
6  
7  
8  
9  
10

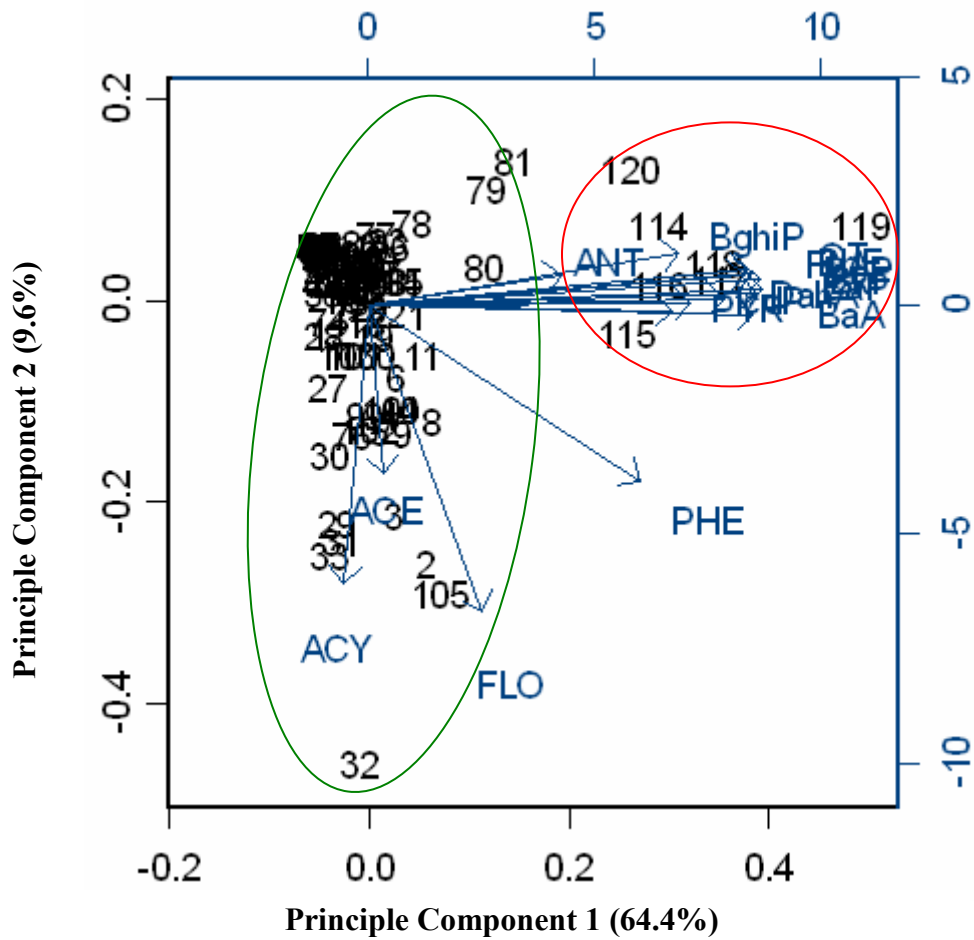

2  
3  
4  
5  
6 **Figure S24:** Individual PAH flux profiles in all WACAP lake sediment cores and intervals were  
7 analyzed by PCA using S-Plus 7.0 (Insightful, Seattle, WA). Results from the PCA showed that  
8 the total variance accounted for by PC1 and PC2. The circle on the right indicates a cluster that  
9 contains all Snyder Lake sediment intervals that dated after 1955. The oval on the left indicates  
10 a second cluster that contains all sediment intervals from the other WACAP catchments  
11 including a sediment interval from Snyder Lake dated at 1893. The arrows indicate the direction  
12 and magnitude of the individual PAH loadings.  
13  
14  
15  
16  
17  
18  
19  
20  
21  
22  
23  
24  
25  
26

1 **Table S1:** Physical and chemical limnological characteristics of each lake sites. \* indicates the data was  
 2 obtained from the parameter-elevation regressions on independent slopes model (PRISM)  
 3 (average annual total precipitation from 1971-2000, 800×800 m). Sampling site's physical  
 4 characteristics were determined from USGS 15' topographic quadrangles, mapping datum  
 5 WGS84, and on-site measurements.  
 6  
 7

| Sequoia National Park                         |              |              |              | Rocky Mountain National Park                  |                |              |                 |
|-----------------------------------------------|--------------|--------------|--------------|-----------------------------------------------|----------------|--------------|-----------------|
|                                               | Pear Lake    | Emerald Lake | Pear/Emerald |                                               | Lone Pine Lake | Mills Lake   | Mills/Lone Pine |
| <b>Catchment Characteristics</b>              |              |              |              | <b>Catchment Characteristics</b>              |                |              |                 |
| Latitude (dd)                                 | 36.6         | 36.58        | 1.00         | Latitude (dd)                                 | 40.22          | 40.29        | 1.00            |
| Longitude (dd)                                | 118.67       | 118.67       | 1.00         | Longitude (dd)                                | 105.73         | 105.64       | 1.00            |
| Elevation (masl)                              | 2904         | 2800         | 1.04         | Elevation (masl)                              | 3024           | 3030         | 1.00            |
| Lake Volume (m <sup>3</sup> )                 | 578000       | 160000       | 3.61         | Lake Volume (m <sup>3</sup> )                 | 128325         | 78251        | 0.61            |
| Lake Surface Area (m <sup>2</sup> )           | 73294        | 25342        | 2.89         | Lake Surface Area (m <sup>2</sup> )           | 49134.9        | 61148        | 1.24            |
| Catchment Area (m <sup>2</sup> )              | 1555595      | 1149318      | 1.35         | Catchment Area (m <sup>2</sup> )              | 21144492       | 15093297     | 0.71            |
| Hydraulic Residence Time (d)                  | 96.0         | 34.5         | 2.78         | Hydraulic Residence Time (d)                  | 4.3            | 3.3          | 0.77            |
| *Average Annual Precipitation (cm)            | 74.9         | 86.1         | 0.87         | *Average Annual Precipitation (cm)            | 97.6           | 107.1        | 1.10            |
| *Average Annual Max Temp (°C)                 | 10.9         | 11.6         | 0.94         | *Average Annual Max Temp (°C)                 | 7.7            | 7.4          | 0.96            |
| Focusing Factor                               | 2.22         | 3.73         | 0.60         | Focusing Factor                               | 1.87           | 1.48         | 0.79            |
| <b>Limnological Characteristics (2003)</b>    |              |              |              | <b>Limnological Characteristics (2003)</b>    |                |              |                 |
| Primary Productivity                          | Oligotrophic | Oligotrophic |              | Primary Productivity                          | Oligotrophic   | Oligotrophic |                 |
| Dissolved Organic Carbon (mgL <sup>-1</sup> ) | 0.82         | 0.94         | 0.87         | Dissolved Organic Carbon (mgL <sup>-1</sup> ) | 1.73           | 1.55         | 0.90            |
| Total Nitrogen (mgL <sup>-1</sup> )           | 0.111        | 0.168        | 0.66         | Total Nitrogen (mgL <sup>-1</sup> )           | 0.17           | 0.38         | 2.24            |
| Total Phosphorus (µg L <sup>-1</sup> )        | 0.59         | 1.47         | 0.40         | Total Phosphorus (µg L <sup>-1</sup> )        | 2.7            | 2.8          | 1.04            |
| Chlorophyll a (µg L <sup>-1</sup> )           | 0.64         | 0.62         | 1.03         | Chlorophyll a (µg L <sup>-1</sup> )           | 2.0            | 2.1          | 1.05            |
| Turbidity (NTU)                               | 0.232        | 0.259        | 0.90         | Turbidity (NTU)                               | 0.3            | 0.6          | 2.00            |
| Specific Conductivity (µS cm <sup>-1</sup> )  | 4.02         | 5.42         | 0.74         | Specific Conductivity (µS cm <sup>-1</sup> )  | 14.0           | 11.9         | 0.85            |
| pH                                            | 6.10         | 6.22         | 0.98         | pH                                            | 6.67           | 6.05         | 0.91            |
| <b>Mt. Rainier National Park</b>              |              |              |              | <b>Olympic National Park</b>                  |                |              |                 |
|                                               | Golden Lake  | LP19         | Golden/LP19  |                                               | Hoh Lake       | PJ Lake      | Hoh/PJ          |
| <b>Catchment Characteristics</b>              |              |              |              | <b>Catchment Characteristics</b>              |                |              |                 |
| Latitude (dd)                                 | 46.89        | 46.82        | 1.00         | Latitude (dd)                                 | 47.90          | 47.95        | 1.00            |
| Longitude (dd)                                | 121.90       | 121.89       | 1.00         | Longitude (dd)                                | 123.79         | 123.42       | 1.00            |
| Elevation (masl)                              | 1372         | 1372         | 1.00         | Elevation (masl)                              | 1384           | 1433         | 0.97            |
| Lake Volume (m <sup>3</sup> )                 | 689578       | 99879        | 6.90         | Lake Volume (m <sup>3</sup> )                 | 396198         | 19099        | 20.74           |
| Lake Surface Area (m <sup>2</sup> )           | 66104        | 18441        | 3.58         | Lake Surface Area (m <sup>2</sup> )           | 76595          | 7551         | 10.14           |
| Catchment Area (m <sup>2</sup> )              | 3914345      | 1591387      | 2.46         | Catchment Area (m <sup>2</sup> )              | 2318604        | 3828864      | 0.61            |
| Hydraulic Residence Time (d)                  | 24.8         | 9.1          | 2.73         | Hydraulic Residence Time (d)                  | 40.5           | 1.1          | 36.82           |
| *Average Annual Precipitation (cm)            | 228.4        | 231.2        | 0.99         | *Average Annual Precipitation (cm)            | 451.6          | 225.4        | 2.00            |
| *Average Annual Max Temp (°C)                 | 8.9          | 8.2          | 1.09         | *Average Annual Max Temp (°C)                 | 10.5           | 8.8          | 1.19            |
| Focusing Factor                               | 1.00         | 1.50         | 0.67         | Focusing Factor                               | 3.10           | 0.78         | 3.97            |
| <b>Limnological Characteristics (2005)</b>    |              |              |              | <b>Limnological Characteristics (2005)</b>    |                |              |                 |
| Primary Productivity                          | Oligotrophic | Oligotrophic |              | Primary Productivity                          | Oligotrophic   | Oligotrophic |                 |
| Dissolved Organic Carbon (mgL <sup>-1</sup> ) | 1.88         | 1.37         | 1.37         | Dissolved Organic Carbon (mgL <sup>-1</sup> ) | 0.74           | 1.05         | 0.70            |
| Total Nitrogen (mgL <sup>-1</sup> )           | 0.069        | 0.074        | 0.93         | Total Nitrogen (mgL <sup>-1</sup> )           | 0.058          | 0.091        | 0.64            |
| Total Phosphorus (µg L <sup>-1</sup> )        | 0.6          | 0.92         | 0.65         | Total Phosphorus (µg L <sup>-1</sup> )        | 1.16           | 2.78         | 0.42            |
| Chlorophyll a (µg L <sup>-1</sup> )           | 0.35         | 0.6          | 0.58         | Chlorophyll a (µg L <sup>-1</sup> )           | 0.83           | 1.77         | 0.47            |
| Turbidity (NTU)                               | 0.52         | 0.31         | 1.65         | Turbidity (NTU)                               | 0.39           | 0.36         | 1.06            |
| Specific Conductivity (µS cm <sup>-1</sup> )  | 10.08        | 10.72        | 0.94         | Specific Conductivity (µS cm <sup>-1</sup> )  | 63.69          | 127.40       | 0.50            |
| pH                                            | 6.47         | 6.63         | 0.98         | pH                                            | 7.52           | 8.14         | 0.92            |

8  
9  
10  
11  
12  
13  
14  
15  
16  
17  
18  
19  
20  
21  
22  
23

1  
2  
3  
4  
5  
6  
7  
8  
9

**Table S1 (Continued):** Physical and Chemical Limnological Characteristics of Lake sites. \* indicates the data was obtained from the parameter-elevation regressions on independent slopes model (average annual total precipitation from 1971-2000, 800×800 m). Sampling site's physical characteristics were determined from USGS 15' topographic quadrangles, mapping datum WGS84, and on-site measurements.

| Glacier National Park                                                 |                |              |                  | Denali National Park                          |              |              |               |
|-----------------------------------------------------------------------|----------------|--------------|------------------|-----------------------------------------------|--------------|--------------|---------------|
|                                                                       | Snyder Lake    | Oldman Lake  | Snyder/Oldman    |                                               | Wonder Lake  | McLeod Lake  | Wonder/Mcleod |
| <b>Catchment Characteristics</b>                                      |                |              |                  | <b>Catchment Characteristics</b>              |              |              |               |
| Latitude (dd)                                                         | 48.62          | 48.5         | 1.00             | Latitude (dd)                                 | 63.48        | 63.38        | 1.00          |
| Longitude (dd)                                                        | 113.79         | 113.46       | 1.00             | Longitude (dd)                                | 150.88       | 151.07       | 1.00          |
| Elevation (masl)                                                      | 1600           | 2026         | 0.79             | Elevation (masl)                              | 610          | 609          | 1.00          |
| Lake Volume (m <sup>3</sup> )                                         | 38298          | 1266063      | 0.03             | Lake Volume (m <sup>3</sup> )                 | 77653853     | 1847704      | 42.03         |
| Lake Surface Area (m <sup>2</sup> )                                   | 25629          | 181755       | 0.14             | Lake Surface Area (m <sup>2</sup> )           | 2656472      | 358512       | 7.41          |
| Catchment Area (m <sup>2</sup> )                                      | 4012230        | 2653727      | 1.51             | Catchment Area (m <sup>2</sup> )              | 28965859     | 1722319      | 16.82         |
| Hydraulic Residence Time (d)                                          | 1.8            | 92.0         | 0.02             | Hydraulic Residence Time (d)                  | 2740         | 2170         | 1.26          |
| *Average Annual Precipitation (cm)                                    | 155.9          | 82.5         | 1.89             | *Average Annual Precipitation (cm)            | 66           | 70           | 0.94          |
| *Average Annual Max Temp (°C)                                         | 8.6            | 9.0          | 0.96             | *Average Annual Max Temp (°C)                 | 3.1          | 3.2          | 0.97          |
| Focusing Factor                                                       | 1.37           | 4.55         | 0.30             | Focusing Factor                               | 3.49         | 2.60         | 1.34          |
| <b>Limnological Characteristics (2005)</b>                            |                |              |                  | <b>Limnological Characteristics (2004)</b>    |              |              |               |
| Primary Productivity                                                  | Oligotrophic   | Oligotrophic |                  | Primary Productivity                          | Oligotrophic | Oligotrophic |               |
| Dissolved Organic Carbon (mgL <sup>-1</sup> )                         | 0.65           | 0.70         | 0.93             | Dissolved Organic Carbon (mgL <sup>-1</sup> ) | 2.10         | 2.25         | 0.93          |
| Total Nitrogen (mgL <sup>-1</sup> )                                   | 0.095          | 0.065        | 1.46             | Total Nitrogen (mgL <sup>-1</sup> )           | 0.105        | 0.131        | 0.80          |
| Total Phosphorus (µgL <sup>-1</sup> )                                 | 2.67           | 0.55         | 4.85             | Total Phosphorus (µgL <sup>-1</sup> )         | 0.5          | 0.104        | 4.81          |
| Chlorophyll a (µgL <sup>-1</sup> )                                    | 4.73           | 0.77         | 6.14             | Chlorophyll a (µgL <sup>-1</sup> )            | 0.49         | 0.61         | 0.80          |
| Turbidity (NTU)                                                       | 0.64           | 0.35         | 1.82             | Turbidity (NTU)                               | 0.34         | 0.29         | 1.18          |
| Specific Conductivity (µS cm <sup>-1</sup> )                          | 16.80          | 159.10       | 0.11             | Specific Conductivity (µS cm <sup>-1</sup> )  | 190.10       | 8.41         | 22.61         |
| pH                                                                    | 6.42           | 8.24         | 0.78             | pH                                            | 8.18         | 7.24         | 1.13          |
| <b>Gates of the Arctic National Park and Noatak National Preserve</b> |                |              |                  |                                               |              |              |               |
|                                                                       | Matcharak Lake | Burial Lake  | Matcharak/Burial |                                               |              |              |               |
| <b>Catchment Characteristics</b>                                      |                |              |                  |                                               |              |              |               |
| Latitude (dd)                                                         | 67.75          | 68.43        | 0.99             |                                               |              |              |               |
| Longitude (dd)                                                        | 156.21         | 159.18       | 0.98             |                                               |              |              |               |
| Elevation (masl)                                                      | 488            | 427          | 1.14             |                                               |              |              |               |
| Lake Volume (m <sup>3</sup> )                                         | 21889008       | 5297945      | 4.13             |                                               |              |              |               |
| Lake Surface Area (m <sup>2</sup> )                                   | 3006999        | 654630       | 4.59             |                                               |              |              |               |
| Catchment Area (m <sup>2</sup> )                                      | 20650752       | 1837879      | 11.24            |                                               |              |              |               |
| Hydraulic Residence Time (d)                                          | 4050           | 88440        | 0.05             |                                               |              |              |               |
| *Average Annual Precipitation (cm)                                    | 43             | 39           | 1.10             |                                               |              |              |               |
| *Average Annual Max Temp (°C)                                         | -3.6           | -4.7         | 0.77             |                                               |              |              |               |
| Focusing Factor                                                       | 1.25           | 0.88         | 1.42             |                                               |              |              |               |
| <b>Limnological Characteristics (2004)</b>                            |                |              |                  |                                               |              |              |               |
| Primary Productivity                                                  | Oligotrophic   | Oligotrophic |                  |                                               |              |              |               |
| Dissolved Organic Carbon (mgL <sup>-1</sup> )                         | 4.71           | 3.32         | 1.42             |                                               |              |              |               |
| Total Nitrogen (mgL <sup>-1</sup> )                                   | 0.284          | 0.233        | 1.22             |                                               |              |              |               |
| Total Phosphorus (µgL <sup>-1</sup> )                                 | 1.09           | 9.06         | 0.12             |                                               |              |              |               |
| Chlorophyll a (µgL <sup>-1</sup> )                                    | 0.96           | 0.81         | 1.19             |                                               |              |              |               |
| Turbidity (NTU)                                                       | 0.35           | 0.32         | 1.11             |                                               |              |              |               |
| Specific Conductivity (µS cm <sup>-1</sup> )                          | 248.10         | 35.08        | 7.07             |                                               |              |              |               |
| pH                                                                    | 8.31           | 7.57         | 1.10             |                                               |              |              |               |

10  
11  
12  
13  
14  
15  
16  
17  
18  
19  
20  
21  
22  
23

**Reference**

(1) Usenko, S.; Hageman, K. J.; Schmedding, D. W.; Wilson, G. R.; Simonich, S. L. Trace Analysis of Semi-Volatile Organic Compounds in Large Volume Samples of Snow, Lake Water, and Groundwater. *Environ. Sci. & Technol.* **2005**, *39*, 6006-6015.

(2) Hageman, K. J.; Simonich, S. L.; Campbell, D. H.; Wilson, G. R.; Landers, D. H. Atmospheric Deposition of Current-Use and Historic-Use Pesticides in Snow at National Parks in the Western United States. *Environ. Sci. & Technol.* **2006**, *40*, 3174-3180.

(3) Usenko, S.; Landers, D. H.; Appleby, P. G.; Simonich, S. L. Current and Historical Deposition of PBDEs, Pesticides, PCBs, and PAHs to Rocky Mountain National Park, USA. *Environ. Sci. & Technol.* **2007**, *41*, 7235-7241.



- 1 (4) Appleby, P. G.; Nolan, P. J.; Gifford, D. W.; Godfrey, M. J.; Oldfield, F.; Anderson, N. J.;  
2 Battarbee, R. W.  $^{210}\text{Pb}$  Dating by low background gamma counting. *Hydrobiologia* **1986**, *141*, 21-27.
- 3 (5) Appleby, P. G.; Piliposian, G. T. Radiometric dating of sediment records from mountain lakes in  
4 the Tatra Mountains. *Biologia* **2006**, *61*, S51-S64.
- 5 (6) Appleby, P. G. Chronostratigraphic Techniques in Recent Sediments. In *Tracking Environmental*  
6 *Change Using Lake Sediments*; Last, W. M., Smol, J. P., Eds.; Kluwer Academic Publishers, 2001; Vol.  
7 1.
- 8 (7) Landers, D. H.; Simonich, S. L.; Jaffe, D. A.; Geiser, L.; Campbell, D. H.; Schwindt, A.;  
9 Schreck, C.; Kent, M.; Hafner, W. D.; Taylor, G. E.; Hageman, K. J.; Blett, T.; Erway, M. M.; Pierson,  
10 S.; Christie, S. An Assessment of Airborne Contaminants in National Parks of the Western United  
11 States. EPA/600/R-03/035. [http://www2.nature.nps.gov/air/Studies/air\\_toxics/wacap.cfm](http://www2.nature.nps.gov/air/Studies/air_toxics/wacap.cfm). **2007**.
- 12 (8) Zhu, L. Y.; Hites, R. A. Brominated Flame Retardants in Sediment Cores from Lake Michigan  
13 and Erie. *Environ. Sci. & Technol.* **2005**, *39*, 3488-3494.
- 14 (9) Granstein, W. C.; Turekian, K. K.  $^{210}\text{Pb}$  and  $^{137}\text{Cs}$  in Air and Soils Measure the Rate and Vertical  
15 Profile of Aerosol Scavenging. *J. Geophys. Res.* **1986**, *91*, 14,355-314,366.
- 16 (10) Carpenter, R.; Peterson, M. L.; Bennett, J. T.; Somayajulu, B. L. K. Mixing and cycling of  
17 uranium, thorium and  $^{210}\text{Pb}$  in Puget Sound sediments. *Geochim. Cosmochim. Acta* **1984**, *48*, 1949-  
18 1963.
- 19 (11) Monaghan, M. C. Lead  $^{210}\text{Pb}$  in Surface Air and Soils From California: Implications for the  
20 Behavior of Trace Constituents in the Planetary Boundary Layer. *J. Geophys. Res.* **1989**, *94*, 6449-6456.
- 21 (12) Monaghan, M. C.; Holdsworth, G. The origin of non-sea-salt sulphate in the Mount Logan ice  
22 core. *Nature* **1990**, *343*, 245 - 248.
- 23 (13) Nevissi, A. E. Measurement of  $^{210}\text{Pb}$  Atmospheric Flux in the Pacific Northwest. *Health Phys.*  
24 **1985**, *48*, 169-174.
- 25 (14) Appleby, P. G. Radiometric dating of sediment cores. WACAPs Project - Year 3 Report. **2005**.
- 26 (15) Peterson, D. L.; Sullivan, T.; Eilers, J. M.; Brace, S.; Horner, D.; Savig, K.; Morse, D.  
27 Assessment of Air Quality and Air Pollutant Impacts in National Parks of the Rocky Mountains and  
28 Northern Great Plains. *U.S. Department of the Interior National Park Service*. **1998**,  
29 <http://www2.nature.nps.gov/air/Pubs/>.
- 30 (16) Sanderson, E. G.; Farant, J. P. Atmospheric size distribution of PAHs: Evidence of a high-  
31 volume sampling artifact. *Environ. Sci. & Technol.* **2005**, *39*, 7631-7637.
- 32 (17) Schauer, J. J.; Kleeman, M. J.; Cass, G. R.; Simoneit, B. R. T. Measurement of emissions from  
33 air pollution sources. 3. C-1-C-29 organic compounds from fireplace combustion of wood. *Environ. Sci.*  
34 *& Technol.* **2001**, *35*, 1716-1728.
- 35 (18) Schauer, J. J.; Kleeman, M. J.; Cass, G. R.; Simoneit, B. R. T. Measurement of emissions from  
36 air pollution sources. 5. C-1-C-32 organic compounds from gasoline-powered motor vehicles. *Environ.*  
37 *Sci. & Technol.* **2002**, *36*, 1169-1180.
- 38 (19) Yunker, M. B.; Macdonald, R. W.; Vingarzan, R.; Mitchell, R. H.; Goyette, D.; Sylvestre, S.  
39 PAHs in the Fraser River basin: a critical appraisal of PAH ratios as indicators of PAH source and  
40 composition. *Org. Geochem.* **2002**, *33*, 489-515.
- 41 (20) Booth, P.; Gribben, K. A review of the formation, environmental fate, and forensic methods for  
42 PAHs from aluminum smelting processes. *Environ. Forensics* **2005**, *6*, 133-142.
- 43  
44
